# Supplementary material for: HERC1 Regulates Breast Cancer Cells Migration and Invasion
Source: Cancers (Basel). 2021 Mar 15;13(6):1309. doi: 10.3390/cancers13061309 (PMC8061768; doi:10.3390/cancers13061309)
Supplement: Supplementary file 1 [file cancers-13-01309-s001.zip › cancers-1116558-supplementary/st1_UB-DUB_shRNA_library.xlsx]

## Sheet: CLONE LIST
CloneID	GeneSymbol	targetSeq
TRCN0000003373	AMFR	AGGAGAGAACTTGGATGAGAA
TRCN0000003374	AMFR	CATGAGGTGCAACGTCGAATT
TRCN0000003375	AMFR	CCTCGCTTAAACCAACACAAT
TRCN0000038799	ANAPC11	GCTGCAACAAGGTGGAAACAA
TRCN0000038801	ANAPC11	CCGCCAGGAATGGAAGTTCAA
TRCN0000038802	ANAPC11	CAACGATGAGAACTGTGGCAT
TRCN0000038803	ANAPC11	GCAGGATGGCATTTAACGGAT
TRCN0000004357	ANAPC2	GCAGATTAAAGCAAGTCAGAT
TRCN0000004358	ANAPC2	GCTGCTCTTCTGGACGTACAT
TRCN0000004359	ANAPC2	CCCGGCACCTTCTCTGTCATT
TRCN0000004360	ANAPC2	CCTCTATATCTCTGCCATCAA
TRCN0000007238	APPBP1	CCAAGCAGTATTGAAGATATA
TRCN0000007239	APPBP1	CGCTGCATAAATATCACCAAA
TRCN0000007240	APPBP1	CCAGGAGTATCTAACTATCAA
TRCN0000007241	APPBP1	GCCATGGAATTCTTACAAGAA
TRCN0000007242	APPBP1	GCATGTCACAAACTTCAGCAA
TRCN0000007500	ARIH1	CCATCTAGAGTGCTCATGCAA
TRCN0000007501	ARIH1	GCCAGATGAATACAAGGTCAT
TRCN0000007502	ARIH1	GCTACCTTGAACGAGATATTT
TRCN0000007503	ARIH1	CCATGTTGTTAAAGTCCAATA
TRCN0000007504	ARIH1	CCTGTTAAATGTAAGTGGTTA
TRCN0000034269	ARIH2	CCTCCCAAATAAATTTGCTTT
TRCN0000034270	ARIH2	CCTGCAATACACCTACCCATA
TRCN0000034271	ARIH2	CGACTCTGAAACAGCCAACTA
TRCN0000034272	ARIH2	GCTGGATGTGTCTAGGAGATT
TRCN0000034273	ARIH2	GAGGACTATTACGTGGGAGTA
TRCN0000034669	ATE1	CGGGTGACTTTGCATTGATAA
TRCN0000034670	ATE1	GTCAGTATAGACCTTCTGATT
TRCN0000034671	ATE1	GATGACATCAAAGAGAGTTTA
TRCN0000034672	ATE1	CCTGAGACATATGTTTGGGTA
TRCN0000034673	ATE1	CACAATAAGGTGCCGACCTTT
TRCN0000007405	ATXN3	CGTCGGTTGTAGGACTAAATA
TRCN0000007406	ATXN3	CGAGTGTTAGAAGCAAATGAT
TRCN0000007407	ATXN3	GCAGGGCTATTCAGCTAAGTA
TRCN0000007408	ATXN3	CGCCAAGAAATTGACATGGAA
TRCN0000007409	ATXN3	GTGCTCAACATTGCCTGAATA
TRCN0000007370	BAP1	GCCACCATGTTGACATAAGTT
TRCN0000007371	BAP1	CGTCCGTGATTGATGATGATA
TRCN0000007372	BAP1	CGTGGAAGATTTCGGTGTCAA
TRCN0000007373	BAP1	CCCTGTATATGGATTTATCTT
TRCN0000007374	BAP1	CCACAACTACGATGAGTTCAT
TRCN0000003743	BARD1	CCAGACACTAAGAGCAGGAAT
TRCN0000003744	BARD1	GTGGATATAGTCAAGCTGTTA
TRCN0000003745	BARD1	CCACCTTCATGCAAACGTAAA
TRCN0000003746	BARD1	AGGTAGAGTCATTCATATTTG
TRCN0000003747	BARD1	GCTGTTTGATGGATGCTACTT
TRCN0000003780	BIRC2	GCCGAATTGTCTTTGGTGCTT
TRCN0000003781	BIRC2	ACATTCATTATCTCCCACCTT
TRCN0000003782	BIRC2	GCTGCGGCCAACATCTTCAAA
TRCN0000003783	BIRC2	CCCTACAGTTATGCAATGAGT
TRCN0000003784	BIRC2	TGGTTAAATCTGCCTTGGAAA
TRCN0000003775	BIRC3	GCAGAGTCATCAATTATCCAT
TRCN0000003776	BIRC3	GCACTACAAACACAATATTCA
TRCN0000003777	BIRC3	CCGTCAAGTTCAAGCCAGTTA
TRCN0000003778	BIRC3	CAGTTCGTACATTTCTTTCAT
TRCN0000003779	BIRC3	GCTCTTATTCAAACTCTCCAT
TRCN0000003785	BIRC4	AGCTGTAGATAGATGGCAATA
TRCN0000003786	BIRC4	GCACTCCAACTTCTAATCAAA
TRCN0000003787	BIRC4	GACATGGATATACTCAGTTAA
TRCN0000003788	BIRC4	CAGAATGGTCAGTACAAAGTT
TRCN0000004157	BIRC6	CCATGCTATATCCAGAAGTAA
TRCN0000004158	BIRC6	GCGTTCTTTCTACAGTGCATT
TRCN0000004159	BIRC6	GCTGTAGTGAATGGTGCAAAT
TRCN0000004160	BIRC6	CGGCTATGAAACCCAAACCTT
TRCN0000004161	BIRC6	GCTCATTTGTTGGTTTCAGAT
TRCN0000007629	BRAP	CGCCAGTTCAACTCAATAGAA
TRCN0000007630	BRAP	GCAGGAAATGAACAAGTGTTT
TRCN0000007631	BRAP	CCAGGAGAGAAAGTAGCGATT
TRCN0000007632	BRAP	CCTTACAGTTAGAGTATTCAT
TRCN0000007633	BRAP	CCATTTAACGACGTAATTGAA
TRCN0000009823	BRCA1	TATAAGACCTCTGGCATGAAT
TRCN0000009824	BRCA1	TATAGCTGTTGGAAGGACTAG
TRCN0000010305	BRCA1	AGAATCCTAGAGATACTGAA
TRCN0000039833	BRCA1	CCCTAAGTTTACTTCTCTAAA
TRCN0000039834	BRCA1	GCCCACCTAATTGTACTGAAT
TRCN0000039835	BRCA1	CCCACCTAATTGTACTGAATT
TRCN0000039836	BRCA1	CCCTTCTAAATGCCCATCATT
TRCN0000039837	BRCA1	GCCTACAAGAAAGTACGAGAT
TRCN0000006541	BTRC	CCATTAAAGTTGCGGTATTTA
TRCN0000006542	BTRC	GCACATAAACTCGTATCTTAA
TRCN0000006543	BTRC	GCGTTGTATTCGATTTGATAA
TRCN0000006544	BTRC	GCGTTTCAATAATGGCATGAT
TRCN0000006545	BTRC	GCTGAACTTGTGTGCAAGGAA
TRCN0000007599	C20orf18	CCACAACACTCATCTGTCAAA
TRCN0000007600	C20orf18	GCAGGGTAAATGGGATTCCTT
TRCN0000007601	C20orf18	GCAGATGAACTGCAAGGAGTA
TRCN0000007602	C20orf18	CCCTGAGGATTACCAGCGATT
TRCN0000007603	C20orf18	GCCCTGATATGACAGTGGCGT
TRCN0000003459	CAND1	CTTGCCTAATACACTTCAGAT
TRCN0000003460	CAND1	TCCATAATCCAGAGGTTGTAA
TRCN0000003461	CAND1	GTCAACAACAAGAACCTACAT
TRCN0000003462	CAND1	GTACTCTTTCTGCCCTTGATA
TRCN0000003463	CAND1	CGGTTGATGATGGTCTGGATA
TRCN0000010310	CBL	ACAAGAAGATGGTGGAGAAG
TRCN0000010311	CBL	ATATCACATCAGTGGTTCCA
TRCN0000039723	CBL	CCAGTGAGTTGGGAGTTATTA
TRCN0000039724	CBL	CCGTACTATCTTGTCAAGATA
TRCN0000039725	CBL	CCCTTCATAAAGACAAACCAT
TRCN0000039726	CBL	CCCTCACAATAAACCTCTCTT
TRCN0000039727	CBL	GCCGATGTGAAATTAAAGGTA
TRCN0000003831	CCNF	CTCAACTCTCAACTCACTGTA
TRCN0000003832	CCNF	GCAACAGGTGAAGCGGATAAA
TRCN0000003833	CCNF	GCTCACGGACAACACTTACAA
TRCN0000003834	CCNF	TCAGGCCAGGAAGTCATGTTT
TRCN0000003835	CCNF	CGCACCTTTCATCTGGCTCTT
TRCN0000007375	CDC23	GCAGGAGGTAATATGCTATAA
TRCN0000007376	CDC23	GCTCGTATATTGTTTCCCAAA
TRCN0000007377	CDC23	CCTGTCCATAAACAGCGATTT
TRCN0000007378	CDC23	CCAGGCTTATAGACATGCCAT
TRCN0000007379	CDC23	GCCCAGTGTTACATCAAATAT
TRCN0000007299	CDC34	CCAGAATAAACTTGCCGAGTT
TRCN0000007300	CDC34	TCGGGAGTACACAGACATCAT
TRCN0000007301	CDC34	GAGTGTGATCTCCCTCCTGAA
TRCN0000007302	CDC34	CTTTCGGTTCCTGACCAAGAT
TRCN0000007303	CDC34	ACGCAGAACGTCAGGACCATT
TRCN0000007702	CHFR	CCTGTTATCCTTGTTTGTAAA
TRCN0000007703	CHFR	CGCCATGAAATTCAATCATAT
TRCN0000007704	CHFR	GCAGTGAAGAAGATGTGCAAA
TRCN0000007705	CHFR	GCATACCTCTATGAATCTTTA
TRCN0000007706	CHFR	GCAGCCTTTCTGCCACCTGTA
TRCN0000015213	CNOT4	CCCTGTAGTTTCTGGACGTTT
TRCN0000015214	CNOT4	CCAGTGCTTATGTAACCTATA
TRCN0000015215	CNOT4	GCCTCTTCACATCAGAAACAA
TRCN0000015216	CNOT4	GCCCTTGGAGATAGATGATAT
TRCN0000015217	CNOT4	CGGTGATAATTCCCAGCAGAT
TRCN0000019199	COPS5	CGCCTTTAGGACATACCCAAA
TRCN0000019200	COPS5	CCAGACTATTCCACTTAATAA
TRCN0000019201	COPS5	CCTGGACTAAGGATCACCATT
TRCN0000019202	COPS5	CCATGATCATTATGGACAGTT
TRCN0000019203	COPS5	GTCTCAGGTTATTAAGGATAA
TRCN0000072558	COPS6	CTTGAGAGAAACCGCTGTCAT
TRCN0000072559	COPS6	CCGAAATATCGAGGTGATGAA
TRCN0000072560	COPS6	CCCTTGTCATTCTCAACATCT
TRCN0000072561	COPS6	CAGTTTGTGAACAAGTTCAAT
TRCN0000072562	COPS6	CGTGGAAGAGAAGATTATCAT
TRCN0000007619	COPS8	CCACTAATGTAAGATACAGAA
TRCN0000007620	COPS8	CCTGGATGTTTCCTTTAACAA
TRCN0000007621	COPS8	GCTCCATAATGACATGAATAA
TRCN0000007622	COPS8	CAGCCAATTATGGAAGCACTT
TRCN0000007623	COPS8	GCTGTGAAAGGCATATTAGAA
TRCN0000003391	CUL1	GCACACAAGATGAATTAGCAA
TRCN0000003392	CUL1	CGTGGTTATATCAGTTGTCTA
TRCN0000003393	CUL1	GCCAGCATGATCTCCAAGTTA
TRCN0000003394	CUL1	GATTTGATGGATGAGAGTGTA
TRCN0000006522	CUL2	CGTTTGCAGTTGATGTGTCTT
TRCN0000006523	CUL2	GCCCTTATTCAAGAGGTGATT
TRCN0000006524	CUL2	GCAGACTATATGGACTGCTTA
TRCN0000006525	CUL2	GCAAGCTACATCGGATGTATA
TRCN0000006526	CUL2	CCCTTGGAGAAAGACTTTATA
TRCN0000073343	CUL3	CCCTGTTGTAATTTGAGATTT
TRCN0000073344	CUL3	CCCAAATCAAAGGAAATAGAA
TRCN0000073345	CUL3	CGTAAGAATAACAGTGGTCTT
TRCN0000073346	CUL3	CGTGTGCCAAATGGTTTGAAA
TRCN0000073347	CUL3	GCGGATAATGAAATCTAGAAA
TRCN0000006527	CUL4A	CCATGATATGTGGTCTAAGAA
TRCN0000006528	CUL4A	GCAGGTGTATAAAGATTCATT
TRCN0000006529	CUL4A	GCCAAAGGTTAATGCAGGAAA
TRCN0000006530	CUL4A	GCAGAACTGATCGCAAAGCAT
TRCN0000006531	CUL4A	CCAGAATATCTTAACCATGTA
TRCN0000006532	CUL4B	GCCATGAAAGAAGCATTTGAA
TRCN0000006533	CUL4B	CCTGAATATCTACATCATGTT
TRCN0000006534	CUL4B	CGGGACTACATGGAAAGAGAT
TRCN0000006535	CUL4B	GCAGAATTTAAAGAGGGTAAA
TRCN0000006536	CUL4B	GCAATTCTTCAGAAAGGTTTA
TRCN0000006537	CUL5	GCAGTAAACTTGCCAAATATA
TRCN0000006538	CUL5	GCAGACTGAATTAGTAGAAAT
TRCN0000006539	CUL5	GCTAGAATGTTTCAGGACATA
TRCN0000006540	CUL5	CGCTGTATTGTTTGCATGGAA
TRCN0000006480	CUL7	CGCTACTGTGAGCACTTTAAT
TRCN0000006481	CUL7	CCTGATCAACTGCCATGTCTA
TRCN0000006482	CUL7	GCACCTGAGTTCTAGACTCAA
TRCN0000006483	CUL7	CATGTTGAGTAGTCCTGATTA
TRCN0000006484	CUL7	GACATGCTCAATCAGGCGATT
TRCN0000039628	CYLD	CCCATTAAATTCAGTGTAGTT
TRCN0000039629	CYLD	GCAGCGTTACAGACAAACAAA
TRCN0000039630	CYLD	GCCCAATACCAATGGAAGTAT
TRCN0000039631	CYLD	CCCACAATTCAGCAGTTGTTA
TRCN0000039632	CYLD	GCGCTGTAACTCTTTAGCATT
TRCN0000082853	DDB1	CCTTGATTGGTGTTGCCAGTT
TRCN0000082854	DDB1	CGACTCAATAAAGTCATCAAA
TRCN0000082855	DDB1	CGACCGTAAGAAGGTGACTTT
TRCN0000082856	DDB1	CGTGTACTCTATGGTGGAATT
TRCN0000082857	DDB1	CCTATCACAATGGTGACAAAT
TRCN0000083993	DDB2	GCAGAGGTGGTGATTTGTTAA
TRCN0000083994	DDB2	CCTCGCTACAACCTCATTGTT
TRCN0000083995	DDB2	GCTGAAGTTTAACCCTCTCAA
TRCN0000083996	DDB2	TCTGGATTCTTACCGGATATT
TRCN0000083997	DDB2	GACACCATCAACATCTGGTTT
TRCN0000005022	DTX1	GCAGAGAGTCAATTTCCCTTT
TRCN0000005023	DTX1	CCACTGCTATCTACCCAACAA
TRCN0000005024	DTX1	CGGTGAAGAACTTGAATGGTA
TRCN0000005025	DTX1	CAACAGCATGTCGCAGATGAA
TRCN0000005026	DTX1	GACCAAGAAGAAGCACCTTAA
TRCN0000004558	DTX2	CGGCAATAAGGATGGAAGTCT
TRCN0000004559	DTX2	CAAGACAGAGATGGACCGCAA
TRCN0000004560	DTX2	AGGCATGACGAGTGTTCTGAT
TRCN0000004561	DTX2	GCAACGGCAATAAGGATGGAA
TRCN0000073223	DTX3	GCTGTGTGTGTTCATCAGATA
TRCN0000073224	DTX3	TGGCGAGACTTCTGACATCTA
TRCN0000073225	DTX3	CCGTGTGTCTATCCTCATAGA
TRCN0000073226	DTX3	CTATGAGAAGTACGGCACCAT
TRCN0000073227	DTX3	GCAGAGAAAGAGCTGAAGAAA
TRCN0000073208	DTX3L	GCTGATTTAATGCCAGTCTAA
TRCN0000073209	DTX3L	GCCAATTACATGATGAATGTA
TRCN0000073210	DTX3L	CCGATGGACATTGATAGCGAT
TRCN0000073211	DTX3L	CGCGTATTAGGAGTCTCAGAT
TRCN0000073212	DTX3L	CACTTACATCAGACCAAGTTT
TRCN0000038864	DUB3	GCCTGAGTTCAACGTCAGAAA
TRCN0000038866	DUB3	GCACCTTAGACCACTGGAAAT
TRCN0000038867	DUB3	CCTCTTGTCTATGTCCTCTAT
TRCN0000038868	DUB3	GCAGGAAGATGCCCATGAATT
TRCN0000038869	DUB4	CCACGGCATTTCAGACACTTT
TRCN0000038870	DUB4	CCACCAAATATTTGGAGGCTA
TRCN0000038871	DUB4	CAACGGACATTACTTCTCTTA
TRCN0000038873	DUB4	CGAAGAACTCAATGGAGAGAA
TRCN0000034244	DZIP3	CGGAAATTGAAGGATGCTTAT
TRCN0000034245	DZIP3	CCACCTCTCATGGAGTACAAT
TRCN0000034246	DZIP3	CCATACTTACTGTTCCTCAAA
TRCN0000034247	DZIP3	CGATTTGTAGTTACCTAGATT
TRCN0000034248	DZIP3	CCTCACATTAAGAAGTTCTTA
TRCN0000004587	E2-230K	CGATGATTCCTATGGCTTCTA
TRCN0000004588	E2-230K	GACATCAAGAAGCTACAGGAA
TRCN0000004589	E2-230K	CGGGTCTCTTCTTCGATGATT
TRCN0000004590	E2-230K	TGTGTTGAGATGCTGCCGTTT
TRCN0000003408	EDD	GCTGTAGATTTCAACTTAGAT
TRCN0000003409	EDD	TGACAGCAGAACAACATAATT
TRCN0000003410	EDD	GCCTTACAGAAATGCCCAGAA
TRCN0000003411	EDD	GCTCGTCTTGATCTACTTTAT
TRCN0000003412	EDD	GCCATTAGAAAGAACCACAAA
TRCN0000009882	EP300	CAGACAAGTCTTGGCATGGTA
TRCN0000009883	EP300	CAATTCCGAGACATCTTGAGA
TRCN0000009884	EP300	TACACTAGAGACACCTTGTAT
TRCN0000039883	EP300	CCTCACTTTATGGAAGAGTTA
TRCN0000039884	EP300	CCAGCCTCAAACTACAATAAA
TRCN0000039886	EP300	CCCGGTGAACTCTCCTATAAT
TRCN0000039887	EP300	CGAGTCTTCTTTCTGACTCAA
TRCN0000003719	ERCC8	GCAGCAGTGATGAAGAAGGAT
TRCN0000003720	ERCC8	TGGAATTAACACCCTTGACAT
TRCN0000003721	ERCC8	GATGGTGTGATTGTACTTTAT
TRCN0000003722	ERCC8	TGATGATGAGACTACAACAAA
TRCN0000003723	ERCC8	GCGCTAATGCTTGAACTCTTT
TRCN0000083298	FANCL	GCCTGAAGATTTACAACTGAA
TRCN0000083299	FANCL	GCCTTATTGAAGAGATAGGAA
TRCN0000083300	FANCL	CCTTTCCATCAAATATGCTTA
TRCN0000083301	FANCL	GCAGAATTGCATTAGGTAATA
TRCN0000083302	FANCL	GCTGAGCAGGAACATACATTT
TRCN0000021999	FBXL11	GCCGCAGAGAACTTTGTGAAT
TRCN0000022000	FBXL11	GCTTGAGAGATCCTCTGATTT
TRCN0000022002	FBXL11	CCCACAGGGATAGAAGATGAA
TRCN0000022003	FBXL11	GCTGATACAGAAGATCAGCTA
TRCN0000033854	FBXL12	CTCTACACGATGCGACCTAAA
TRCN0000033855	FBXL12	GTCTATGGACTGGTGGATGTA
TRCN0000033856	FBXL12	CCTCCGAGATGTGCGCAAGAT
TRCN0000033857	FBXL12	CCGGCTCCATTCCCTGCGGAT
TRCN0000033858	FBXL12	GCCTCACTATGCCCAAGCTCA
TRCN0000062333	FBXL19	CGCTGGATCGAGGATGTTAAA
TRCN0000062334	FBXL19	TGCACCTCAATCTTGCTGGTT
TRCN0000062335	FBXL19	GCACCTGAAGAAGAAACCAAA
TRCN0000062336	FBXL19	GCTGCTTCTCAAGGACAGCTA
TRCN0000062337	FBXL19	GCGGGAGCTGTGTATCTGCAT
TRCN0000004276	FBXL2	GAACCTCAATGGATGCACAAA
TRCN0000004277	FBXL2	GATAACCGACAGCACACTCAT
TRCN0000004278	FBXL2	CTCTCCATTCACTGTCCTAAA
TRCN0000004279	FBXL2	TGGCCTACTTTAATTCACAAT
TRCN0000004280	FBXL2	GTCTATTACAAACAGCTCCTT
TRCN0000073318	FBXL20	CCTAAATGGTTGCCTTGAAAT
TRCN0000073319	FBXL20	GCCAGGAATTGCCATGAACTT
TRCN0000073320	FBXL20	CTTAGCAAGTTCTGTTCCAAA
TRCN0000073321	FBXL20	GCCCACTAATCACAGATGCAT
TRCN0000073322	FBXL20	GCCGAGTAGTGGAGAATATTT
TRCN0000004286	FBXL21	AGACTGTGTGAGAGAAGGTTA
TRCN0000004287	FBXL21	CTTTGTGTAGCTGACCGTTGT
TRCN0000004289	FBXL21	CCCTGTTACTCACCTTTATTT
TRCN0000004281	FBXL3	CGGATGTGAAATAACCAGTTA
TRCN0000004282	FBXL3	CCAAGAAACTGAGGACTACAA
TRCN0000004283	FBXL3	CGATTAGAACATTTGCGCATT
TRCN0000004284	FBXL3	GCCAGCTACATCTTATTTGAA
TRCN0000004285	FBXL3	GCCTGACTTGTGGAGATGTTT
TRCN0000004290	FBXL5	CCTGATGATGAATGGGTGAAA
TRCN0000004291	FBXL5	GCTGAAGATTTGGCTGATATT
TRCN0000004292	FBXL5	GTACAGGAACAGCTTTAAGAA
TRCN0000004293	FBXL5	GCACTTTACTCATAGCACATT
TRCN0000004294	FBXL5	GTCAGAACACTCCACAGGTAT
TRCN0000004295	FBXL6	TCCTCGGCTCACTTTCCTCAA
TRCN0000004296	FBXL6	TGAACCTGATGTGGCTGCCCA
TRCN0000004297	FBXL6	CACTGCGAGAACTGGACTTGA
TRCN0000004298	FBXL6	CTGCGCTTACTGGATCTTCGT
TRCN0000004299	FBXL6	CCCTGTGCTCTCTTAACCTCA
TRCN0000004300	FBXO11	CAAGGAGTAATAGAAGAGAAT
TRCN0000004301	FBXO11	CGCCTCAACTTCAACTACAGA
TRCN0000004302	FBXO11	GCAGTATGTGTTAGTGGTCAA
TRCN0000004303	FBXO11	GAGTGCTAGAAGACAATGATA
TRCN0000004304	FBXO11	GAGAGTTTCCAGCAGTTGTAT
TRCN0000011183	FBXO15	GCAAAGTACAATCTGAGTCAT
TRCN0000011184	FBXO15	CCTTTATCTTAGTATCGCAAA
TRCN0000011185	FBXO15	GCTGGTTATTGGAAGAAAGAA
TRCN0000011186	FBXO15	CCACCAAACATAGACTCCGAT
TRCN0000022434	FBXO17	CATTTAGTTCATTTGCCTGCA
TRCN0000022435	FBXO17	GCCGCAATCTCATCTTCAACT
TRCN0000022436	FBXO17	GCAAGGGCATCCGCTACGTAT
TRCN0000022437	FBXO17	GCCCAGCAACGAAGACAAGGA
TRCN0000022438	FBXO17	GTGGTCAAGTTCTCAGCCTCA
TRCN0000051663	FBXO18	CCTCGTCATTAAAGACAAATT
TRCN0000051664	FBXO18	CCTGACTCATACTATGGGCTT
TRCN0000051665	FBXO18	CGCTGAAATGAGACGGTTTAA
TRCN0000051666	FBXO18	CGTGCCTATTTGGTGTAAGAA
TRCN0000051667	FBXO18	GCTGATTCTGAATCACAAGAT
TRCN0000004305	FBXO2	ACAAAGTGGGCTCTCAATAAA
TRCN0000004306	FBXO2	CACCGTTAAGCTACTGTCCGA
TRCN0000004307	FBXO2	TCGTGGTGAAGGACTGGTACT
TRCN0000034284	FBXO21	CGGGCTCATTATGAAGCATAA
TRCN0000034285	FBXO21	GCCTTCCCTTATGAAACACTA
TRCN0000034286	FBXO21	CCTGGACATCTTTGACTACAT
TRCN0000034287	FBXO21	GCTGGATCTCTATCTGGCAAT
TRCN0000034288	FBXO21	CGGCAACAGAAGATCTTAAAT
TRCN0000004308	FBXO22	CTTCGTGTGGTCCTTGTCTTT
TRCN0000004309	FBXO22	GTAGCAATCGACCTCAGGAAA
TRCN0000004310	FBXO22	CCCAAACAATGCCAAGTCCTT
TRCN0000004311	FBXO22	CGCATCTTACCACATACAGTT
TRCN0000004312	FBXO24	GTAGTGAATGAGACCCAGCTT
TRCN0000004313	FBXO24	TCATGCAAGGAAATAACAGAT
TRCN0000004314	FBXO24	CCTGTCGCTATGTTGTGTTGT
TRCN0000004315	FBXO24	CATATCATCTCATTCCTCCCA
TRCN0000004316	FBXO24	GCATGACTTCCAACCAGAGCA
TRCN0000004317	FBXO25	TCAGAAACATTACCCAGCGAA
TRCN0000004318	FBXO25	CCACCACAATCCTCGCTTAAT
TRCN0000004319	FBXO25	GCCATTCTTGTCTTAGGGATT
TRCN0000004320	FBXO25	GTACGGAGACACACTGCATTT
TRCN0000004321	FBXO25	GAAGTCTGTATTAGTGGGAAA
TRCN0000007792	FBXO27	GAACTTAGAATCTCATCCTTA
TRCN0000007793	FBXO27	CCACGTGTTCTCCAACATCAA
TRCN0000007794	FBXO27	TGGAACAACAATGCCTGCCTT
TRCN0000007795	FBXO27	CCAACCAGACTGTTCTAGATA
TRCN0000004327	FBXO3	CCCATCATCAGAGACCAAATT
TRCN0000004328	FBXO3	AGGAAGATACATTGACCATTA
TRCN0000004329	FBXO3	CCTGGGTTCTATGTGACACTA
TRCN0000004330	FBXO3	CATTCTCTACAACATCAGGAT
TRCN0000004331	FBXO3	CACTGTCTAATCACTATCGTT
TRCN0000073288	FBXO34	GCTGTGAATAACTGCCTGTTT
TRCN0000073289	FBXO34	CCACAGCTTTAATCGGGCAAT
TRCN0000073290	FBXO34	CCACATAACATCAAGTGTCTT
TRCN0000073291	FBXO34	CCAAGAGTTTAGTGGCCCTTA
TRCN0000073292	FBXO34	CGGTAAAGCATCATCTCGAAA
TRCN0000034319	FBXO4	CCAGGTTTGGAAGAATTGAAT
TRCN0000034320	FBXO4	GCTGCATCTGAATCTTCTAAA
TRCN0000034321	FBXO4	CGGGAAGACCATTGTTGGTTT
TRCN0000034322	FBXO4	CGATTGATGTACAGCTATATA
TRCN0000034323	FBXO4	CCTATATCTGAGGTCACTGAT
TRCN0000073323	FBXO44	GCCAACAGCTTTACGGACATT
TRCN0000073324	FBXO44	CCCAATGACCAGGTCAAGAAA
TRCN0000073325	FBXO44	CTCCCACACATTCTCCAACTA
TRCN0000073327	FBXO44	AGGTCAAGAAATACTTCGTTA
TRCN0000004332	FBXO5	TCGCTGTAATTCACCTGCAAA
TRCN0000004333	FBXO5	CGGATAGTTGTAAAGAAGAAA
TRCN0000004334	FBXO5	CGGTGTAGTATCCTGAGGTTT
TRCN0000004335	FBXO5	CGAAAGCCTCAAAGCCTGTAT
TRCN0000004336	FBXO5	CCAGACCAATATCCCAACAAA
TRCN0000007731	FBXO6	TGTGGTAACTTACTGTCACAT
TRCN0000007732	FBXO6	GCATGGCAAATTGATTTCAAT
TRCN0000007733	FBXO6	TGTGCTGAAGAGGATATGTTT
TRCN0000007734	FBXO6	CCTACGAAATGTGCCTCAAGT
TRCN0000004337	FBXO7	CGCCTAATATACCTTCATCCA
TRCN0000004338	FBXO7	GCCACATTCATTAGAGACCTT
TRCN0000004339	FBXO7	CCCTGCTCTTGGTTCTCCTCT
TRCN0000004340	FBXO7	GCTGACTGTTCTGATGCCAAT
TRCN0000004341	FBXO7	CCATCGTCAACTCACACCATT
TRCN0000034314	FBXO8	CCTGATTTAATGCGAGAACTT
TRCN0000034315	FBXO8	CTACTTTATGTCCAAGGGTAT
TRCN0000034316	FBXO8	GAGAGTATCTTGAAACTCTTA
TRCN0000034317	FBXO8	CTGGTCCATATACAATAAGAA
TRCN0000034318	FBXO8	TCTAACACCAATCATCGTAAA
TRCN0000034309	FBXO9	CCTGATATAGAGTTCAAGATT
TRCN0000034310	FBXO9	CCTCAGATCATTGGAGCAGTT
TRCN0000034311	FBXO9	CCACGTTTAAGAACTAGGAAT
TRCN0000034312	FBXO9	CCAGAGGTTCAACAAACTCAT
TRCN0000034313	FBXO9	CCAGGTGTAAGCTCTAGCAAT
TRCN0000004342	FBXW11	TCGTACTCTCAATGGGCACAA
TRCN0000004343	FBXW11	GAACGAATGGTACGCACTGAT
TRCN0000004344	FBXW11	GTCCAGTAAATTGCTAAGTAA
TRCN0000004345	FBXW11	CCATCAGAAGGAAACTATCAA
TRCN0000004346	FBXW11	GTGTCATTGTAACTGGCTCTT
TRCN0000006546	FBXW2	GAACCAAAGTTCTCACCTAAT
TRCN0000006547	FBXW2	GCAAATACATTGTCTGTAGTT
TRCN0000006548	FBXW2	GCCTTTGAAACCTCGTCATTA
TRCN0000006549	FBXW2	GCAGACTTCACTGTGAAAGTA
TRCN0000006550	FBXW2	GCAGCGGTGAAGTTTGATGAA
TRCN0000004585	FBXW4	CTCACCACCAAGCATCTCTAT
TRCN0000004586	FBXW4	GAAGTGGAGATGCAGTCAGAT
TRCN0000004495	FBXW5	CGTGCGGAACAAGCCCTATGA
TRCN0000004496	FBXW5	CATAGACATACACGGACACAT
TRCN0000004497	FBXW5	CGACGAGTGCTTCTTCATCTT
TRCN0000006555	FBXW7	CCTAAAGAGTTGGCACTCTAT
TRCN0000006556	FBXW7	CCAGAGAAATTGCTTGCTTTA
TRCN0000006557	FBXW7	CCAGTCGTTAACAAGTGGAAT
TRCN0000006558	FBXW7	CCAGAGACTGAAACCTGTCTA
TRCN0000004322	FBXW8	GCAGCTTATGAGGATGGGTTT
TRCN0000004323	FBXW8	GTGTGGTCATTGCGGGATATA
TRCN0000004324	FBXW8	CCTTTCCCTATAACCATGTTT
TRCN0000004325	FBXW8	GCCACAAAGAACAGCTCAGAT
TRCN0000004326	FBXW8	CCGGAGAATGAAATGAATGAT
TRCN0000007712	FLJ11011	GCATGAATTAACATGCGTCTT
TRCN0000007713	FLJ11011	CGCTCTCAGTCCAATCAGTTT
TRCN0000007714	FLJ11011	CCTCCTGGAATGACCTTAAAT
TRCN0000007715	FLJ11011	CAGGTCATGTTTACTGGTGAA
TRCN0000007716	FLJ11011	CATCCTCATGTTTATAGCAAT
TRCN0000052738	FLJ30092	CCCACCATTGAAGACATTAAA
TRCN0000052739	FLJ30092	GCCTCTTCATAAACTGTCCAT
TRCN0000052741	FLJ30092	CCTCACCTACAATTACGTCAA
TRCN0000052742	FLJ30092	GCTCTCGATATTTATCCACAA
TRCN0000034119	FLJ31951	AGGTGATTATTGAGTCTTGTA
TRCN0000034120	FLJ31951	CCTCTCTCTATGAATCGGTTT
TRCN0000034121	FLJ31951	GCAGGGTTATCGAGCTTTCAT
TRCN0000034122	FLJ31951	CTTTGGAGAATGGACAGTGAT
TRCN0000004992	FLJ34154	GCTAGGTTTATCTCTAGTATT
TRCN0000004993	FLJ34154	CGCTGCATTCTCGTTGTCTTT
TRCN0000004994	FLJ34154	CGCTGCCTGTACCTTAGATTT
TRCN0000004995	FLJ34154	CCTCAATTTAGACCAAGTATA
TRCN0000004996	FLJ34154	GCCCTCATAAATAGTGACATA
TRCN0000034169	FLJ36180	GCCAGGAAGAAACAAAGACTT
TRCN0000034170	FLJ36180	CCCAGCAAATCAGAAGCCTAA
TRCN0000034171	FLJ36180	CTCACCTGTTTCATCTGCTTA
TRCN0000034172	FLJ36180	TGGACTATGAATCTGGACATA
TRCN0000034173	FLJ36180	GAGGAACATAACACACCTTTA
TRCN0000083858	GAN	CCACATAATATGGGATGCAAT
TRCN0000083859	GAN	CCCGTACATCAGGACAAAGTT
TRCN0000083860	GAN	GCAAGACATAACTTCGGAATT
TRCN0000083861	GAN	CCTGGACAAAGCAACCTGATT
TRCN0000083862	GAN	CCGTGACTTTGCACTACATTA
TRCN0000036864	GPS1	CCGAGACATCATCTTCAAATT
TRCN0000036865	GPS1	GAGAACCTTTAACGTGGACAT
TRCN0000036866	GPS1	CCGCAACCAGATCCATGTCAA
TRCN0000036867	GPS1	CGCTGCCGGTTCAGGTGTTTA
TRCN0000036868	GPS1	CCGTGCCCTCATCCAGTATTT
TRCN0000003413	HACE1	GCTGTGCCATATACTCCAAAT
TRCN0000003414	HACE1	CGGAAGGATTTGTTATGTTTA
TRCN0000003415	HACE1	GCAGATTGTCAGGATGTTATT
TRCN0000003416	HACE1	CCAGAAATTGATGTGAGTGAT
TRCN0000003417	HACE1	GCCAGTACCTAAAGATTCTAA
TRCN0000004083	HECTD1	GCACTTTCTTACCAGCCCTTT
TRCN0000004084	HECTD1	GCCACGAACAACATGAATCTA
TRCN0000004085	HECTD1	GCCCTGATAGTTCTGTTCGTA
TRCN0000004086	HECTD1	CGAGATTTATACGATGACCAT
TRCN0000004087	HECTD1	TCTCTCTTTGTTTGGCATATA
TRCN0000007758	HECTD2	CCTTAGAAACTCTGATACAAT
TRCN0000007759	HECTD2	GCTGTGTATGATACCTTACTT
TRCN0000007760	HECTD2	CCCAGAATTAAATGCTGCATT
TRCN0000007761	HECTD2	CGAAGAAAGAAGCTGCTGAAA
TRCN0000007762	HECTD2	GCCTCATTTAACACCATTGAA
TRCN0000001523	HECW1	GACCTCACTTTCACTGTTAAT
TRCN0000001524	HECW1	CACCCAGATGATGAGGAGATT
TRCN0000004789	HECW2	GCCCAAACATTTCTTTGAGAT
TRCN0000004790	HECW2	CCAGGGAAGTTAAAGTTAATT
TRCN0000004791	HECW2	GCACAATACTTGGAGTCAATT
TRCN0000004792	HECW2	GCTTACAATGACAAGATTGTT
TRCN0000004793	HECW2	CCCTTATCTTAAGATGTCAAT
TRCN0000007243	HERC1	GCCACATTTAGTTACTCTAAA
TRCN0000007244	HERC1	GCTGATAAACTGAGTCCCAAA
TRCN0000007245	HERC1	GCCCAGAATATCACTGTCCTT
TRCN0000007246	HERC1	GCATTCATTTACTCGAACTAT
TRCN0000007247	HERC1	GCCATTGAATATCGACTTCAT
TRCN0000007380	HERC2	CCAGAGGATATTTAAACCAAA
TRCN0000007381	HERC2	CCTGGCATAATGGAGTCATTT
TRCN0000007382	HERC2	CGGACTCTACACAAGATTATT
TRCN0000007383	HERC2	CCTATGAAGATTGATTCTCTT
TRCN0000007384	HERC2	GCAAGTAATTCTAAGCCAAAT
TRCN0000000291	HERC3	GATGTGTTTCTGGGATTGTAT
TRCN0000000292	HERC3	AGGGTGTTATTTGAGAAGTTA
TRCN0000000293	HERC3	CCAAGCACATTATACCAGTTT
TRCN0000000294	HERC3	CAAGGATAACAGGCAGGAATT
TRCN0000000295	HERC3	CGAGAAAGCTATGGAGTGATT
TRCN0000034299	HERC4	CGCAACAAGTTTGGTCAGCTA
TRCN0000034300	HERC4	GCCTATGGAATGTTGGCAGAT
TRCN0000034301	HERC4	CGGTTCAACAAGCAACAGGAA
TRCN0000034302	HERC4	CCATCCTTGGATGATTTGAAA
TRCN0000034303	HERC4	GCTTAATTCTAGTGGTGCGTA
TRCN0000004168	HERC5	GAAGGACTAGACAATCAGAAA
TRCN0000004169	HERC5	GCTGAGGAGAATGGTAATGTT
TRCN0000004170	HERC5	GATGCCTGTTTATTTGGACTT
TRCN0000004171	HERC5	GCGACGAAGACATTATCAAAT
TRCN0000004409	HERPUD1	CACCGTTGTTATGTACCTGCA
TRCN0000004410	HERPUD1	CCTCCTCCTGACGTTGTAAAT
TRCN0000004411	HERPUD1	TGTGCAATGTGAAGAGTCCTT
TRCN0000004412	HERPUD1	GTGTGGATGATGATATGCTTT
TRCN0000007455	HIP2	GCCATTCAAATTGTTGGTGTT
TRCN0000007456	HIP2	CCAGAAACATACCCATTTAAT
TRCN0000007457	HIP2	CCGCACGGTATTATTGTCATT
TRCN0000007458	HIP2	GCTATGGGCTTTGATAGGAAT
TRCN0000007459	HIP2	GTAGCAAATCAGTACAAACAA
TRCN0000034149	IBRDC2	CGGGTTTATATCGAACGCAAT
TRCN0000034150	IBRDC2	CCCATGTATAATCTGTTGTGT
TRCN0000034151	IBRDC2	GTGGACCAGTTTCAACTTTAT
TRCN0000034152	IBRDC2	CCACTCAAGAGCATCAGTGAT
TRCN0000034153	IBRDC2	GCTGAGATTGCCTGTTTGGTA
TRCN0000002087	ITCH	CCAGAAGTCAAGGTCAATTAA
TRCN0000002088	ITCH	GCCTATGTTCGGGACTTCAAA
TRCN0000002089	ITCH	GCCGACAAATACAAATACAAA
TRCN0000002090	ITCH	CCCAAGAATCAGAGGTTATAT
TRCN0000004423	KIAA0317	CGCTCCCTGCATAAGAACATA
TRCN0000004424	KIAA0317	CGCAGTCATCATTTGTCCTTT
TRCN0000004425	KIAA0317	CCCAAATCATAGGACTGCGTA
TRCN0000004426	KIAA0317	GCCCAATTCCAACGTAGTAAA
TRCN0000006489	LMO7	GCCTCTTTAGATTACATAGAA
TRCN0000006490	LMO7	CCTGGGTCTTTGTTATCATTT
TRCN0000006491	LMO7	GCGTCATTAAGAAGATCAATA
TRCN0000006492	LMO7	GCTATTAACAACACCAAGTTT
TRCN0000006493	LMO7	CCGGTTTATACAGAAGCAGAT
TRCN0000073123	LNX	GCCTCCTAGAAACTACACTAT
TRCN0000073124	LNX	CGGTGCTTGTATAACTGTAAA
TRCN0000073125	LNX	CCACTATTAGAAGCAGATCAT
TRCN0000073126	LNX	CCTTTGAGAGATCCACTATTA
TRCN0000073127	LNX	GCCAGGAGACATCATTCTAAA
TRCN0000073238	LOC283514	GCGAGACTTCATTTCTACAAA
TRCN0000073239	LOC283514	GCCGGCTGATTGGATCATCAT
TRCN0000073240	LOC283514	AGGAAACAGGAGAGGCATGAA
TRCN0000073241	LOC283514	CCTGGAGGATATAGTTCTGGT
TRCN0000073242	LOC283514	CTGCGGCAGATCCATAGGGTT
TRCN0000034163	LOC286480	GACCAAGAGATACGCAACGTA
TRCN0000007753	LOC92912	GCACAAAGACTCCTTGAGCAA
TRCN0000007754	LOC92912	GCCACCTTAGTCAAAGGCAAA
TRCN0000007755	LOC92912	GAGCCCAACAATCCTATAATT
TRCN0000007756	LOC92912	CTGGATGTTGAGATGCTAGAT
TRCN0000007757	LOC92912	CCATTTGTTCGAGTGGTGTTA
TRCN0000022382	LRRC29	CAGAACTCACAGACAACGGCT
TRCN0000022383	LRRC29	CTGACCTGACCCTAACACTCT
TRCN0000073153	LRSAM1	GCAGATCAGGAGCCAGATTAA
TRCN0000073154	LRSAM1	GCAACCATCAAGGTTCTAGAT
TRCN0000073155	LRSAM1	GATGAACGATTCCAGCAGATT
TRCN0000073156	LRSAM1	CGTGGAAAGGAATCAACTGAT
TRCN0000073157	LRSAM1	TGATTCAGTATCAACGGCTTT
TRCN0000003376	MDM2	CTTTGGTAGTGGAATAGTGAA
TRCN0000003377	MDM2	GATTCCAGAGAGTCATGTGTT
TRCN0000003378	MDM2	CGATTATATGATGAGAAGCAA
TRCN0000003379	MDM2	CTGTGTGTAATAAGGGAGATA
TRCN0000003380	MDM2	CTCAGCCATCAACTTCTAGTA
TRCN0000052948	MED8	CCCTGGATTCATGTTTCTTAT
TRCN0000052949	MED8	CCTGGGTTTCATTCTGGCTAT
TRCN0000052951	MED8	CACTCTGAACAAGGTCTTGAA
TRCN0000052952	MED8	GAGAAGCAACTGACGACAGAT
TRCN0000033789	MGRN1	CCCTTGCAGTTCTCTCTGATT
TRCN0000033790	MGRN1	CCTGAGAGTTTCATAACAGAA
TRCN0000033791	MGRN1	TGGAGCATGATGAGCACTCTT
TRCN0000033792	MGRN1	CGGAAACTACTTTGCTTCGCA
TRCN0000033793	MGRN1	GATTGACTTCTCGGAATGGAA
TRCN0000004553	MIB1	CAGAGGATAAAGATGGTGATA
TRCN0000004554	MIB1	CCTCTGGGATAATGGTGCTAA
TRCN0000004555	MIB1	GCAATAAGTAAGAAACGTGAT
TRCN0000004556	MIB1	CAAGGATAATACCAATGTCAA
TRCN0000004557	MIB1	GCCGAGTACAACAGATTTATT
TRCN0000034114	MIB2	GCAGTGCTACATGCACAACAA
TRCN0000034115	MIB2	AGTCCCAAAGTTTCCAGGCAT
TRCN0000034116	MIB2	GCGCTAGCTGTGAGAAAGATT
TRCN0000034117	MIB2	GAAAGTGTTTGGAGACGGGAA
TRCN0000034118	MIB2	GAGGTGCCAAACATCGATGTT
TRCN0000019809	MID1	GCTGGAAATGTGTTTATTGAT
TRCN0000019810	MID1	CGGCACCAAGTACATCTTCAT
TRCN0000019811	MID1	CCATCGTCTGATTGAGCCAAT
TRCN0000019812	MID1	GCTATGACAAATTGAAGCAAA
TRCN0000019813	MID1	CGTCACCCTACAGAACATCAT
TRCN0000033764	MID2	CCCTTATGTTTCTGGGATGAA
TRCN0000033765	MID2	CCACCATCTATCCGAGAAGAA
TRCN0000033767	MID2	CCTCCTGGATTATGACAACAA
TRCN0000033768	MID2	GCAGAACATTATTGATCGCTT
TRCN0000033794	MKRN1	GCAGCATATCAAATCGTGCAT
TRCN0000033795	MKRN1	CGTATAGTGTAGTGTGCAAGT
TRCN0000033798	MKRN1	ACCTCTCTGACAGTCCGTATA
TRCN0000034289	MYCBP2	GCGTGTCTATACCTGTGAAAT
TRCN0000034291	MYCBP2	CGTCTCTAACACCTGTGGATT
TRCN0000034292	MYCBP2	CCAAAGAACATGCTCCTATAA
TRCN0000034293	MYCBP2	GCTATCAAGATGACAATCTAT
TRCN0000033819	MYLIP	GCTTAAACTTAGAGTCAAGTT
TRCN0000033820	MYLIP	CGACTGGGAATCATAGAAGTT
TRCN0000033821	MYLIP	CCTTGGCAAGAAATATGTCTT
TRCN0000033822	MYLIP	CCAGACCAAGTTTGGAGACTA
TRCN0000033823	MYLIP	CCCAATTAATAGGATAGCTTA
TRCN0000060703	NCOR2	GCCTGTCTAAAGCCTTAACTA
TRCN0000060704	NCOR2	CCTCTATTACTACCTGACTAA
TRCN0000060705	NCOR2	GCTTCACAACACAGGCATGAA
TRCN0000060706	NCOR2	GCAGCGCATCAAGTTCATCAA
TRCN0000060707	NCOR2	GCAGTGTAAGAACTTCTACTT
TRCN0000007550	NEDD4	GCCTTTCTCTTGCCTGCATAT
TRCN0000007551	NEDD4	CCGGAGAATTATGGGTGTCAA
TRCN0000007552	NEDD4	CCGTCAAGTAACTTGGATGTT
TRCN0000007553	NEDD4	GCTGAACTATACGGTTCAAAT
TRCN0000007554	NEDD4	CGGTTGGAGAATGTAGCAATA
TRCN0000000904	NEDD4L	CCTGTTTGTATGCGTTTGCTA
TRCN0000000905	NEDD4L	CGCCTTGACTTACCTCCATAT
TRCN0000000906	NEDD4L	GCGGATGAGAATAGAGAACTT
TRCN0000000907	NEDD4L	GCGAGTACCTATGAATGGATT
TRCN0000000908	NEDD4L	GTCAGAAATAATGGTCACAAA
TRCN0000006497	NEDD8	GCTCATAATGAGGCATCATAT
TRCN0000006498	NEDD8	GAAAGGAGATTGAGATTGACA
TRCN0000006499	NEDD8	GCAAGCAGATGAATGATGAGA
TRCN0000006500	NEDD8	CAGCAGCTGATTACAAGATTT
TRCN0000006501	NEDD8	CCTACAGACAAGGTGGAGCGA
TRCN0000034224	NEURL	CTCGGCTGTTATGCTGTTCTT
TRCN0000034225	NEURL	CCAGAACCTCAAAGACTCTAT
TRCN0000034226	NEURL	CGATGAGTGCACCATTTGCTA
TRCN0000034227	NEURL	CCGGTCCTCATCTACGAGCAA
TRCN0000034228	NEURL	GTTTGCCAATGAGGGCAACAT
TRCN0000014903	NFX1	GCCTCAGTTGTCCCAGTTATT
TRCN0000014904	NFX1	GCAGAAATGAAATTCCACATA
TRCN0000014905	NFX1	CCAGTATATCATTCTTGTCAT
TRCN0000014906	NFX1	GCAGAGAAGATACCCACAGAA
TRCN0000014907	NFX1	GCCGTGAATAAGGGAAAGAAT
TRCN0000034184	NHLRC1	GCTCCATCAAAGTGTTTGATT
TRCN0000034185	NHLRC1	CCTTCGGAGAACTGAAAGGTT
TRCN0000034186	NHLRC1	CCATGGTCACTCATGGTCTTT
TRCN0000034187	NHLRC1	AGCCTCTACTTTCCCTCCAAA
TRCN0000034188	NHLRC1	CGCGCATCAGTTTGGAGAGAA
TRCN0000004211	OTUB1	AGGAGTATGCTGAAGATGACA
TRCN0000004212	OTUB1	CCGGCCTGGACACTACGATAT
TRCN0000004213	OTUB1	TGTGGTTGTAAATGGTCCTAT
TRCN0000004214	OTUB1	CACCACCAATCCGCACATCTT
TRCN0000004215	OTUB1	TGTTTCTATCGGGCTTTCGGA
TRCN0000022409	OTUB2	TGGGCTGCTATGTCTCTGTAT
TRCN0000022410	OTUB2	CCTTCCGTTTACCTGCTCTAT
TRCN0000022411	OTUB2	CGAGATGGATACCGCCCTGAA
TRCN0000022412	OTUB2	CATCCCACTACAACATCCTTT
TRCN0000022413	OTUB2	TGTGGTGGAACTGGTAGAGAA
TRCN0000004447	PARC	CCTTGACCGTTTCTCCAGTTT
TRCN0000004448	PARC	TCTGTAGTGCTTCCTGTTTGC
TRCN0000004449	PARC	CCATCTTTCAGCCCTACATTT
TRCN0000004450	PARC	GCAGGTTCTCAGTAGTCGATT
TRCN0000004451	PARC	GCTGGAATGAGTACCTGACAA
TRCN0000000281	PARK2	CGTGAACATAACTGAGGGCAT
TRCN0000000282	PARK2	CGCAACAAATAGTCGGAACAT
TRCN0000000283	PARK2	CGTGATTTGCTTAGACTGTTT
TRCN0000000284	PARK2	CTCCAAAGAAACCATCAAGAA
TRCN0000000285	PARK2	CTTAGACTGTTTCCACTTATA
TRCN0000036999	PHF21A	GCCCAGAATAACATTCCTATT
TRCN0000037000	PHF21A	CCCATCAAAGTACCACAGTTT
TRCN0000037001	PHF21A	CCAGAGACCTACCATTGCTAT
TRCN0000037002	PHF21A	CCTGGAACTTTAGCAATTGTT
TRCN0000037003	PHF21A	GCTCAGCAATTCCATAAGTAA
TRCN0000022039	PHF21B	GCACTCTTATGTCACCCACAA
TRCN0000022040	PHF21B	CCTGGTTACCACGGAACATTT
TRCN0000022041	PHF21B	GTTAGGCCAAAGACTCTGATT
TRCN0000022042	PHF21B	GTCATCATCATTCAGCCTCAA
TRCN0000022043	PHF21B	AGTGCAGAAATGCCTGGAGTT
TRCN0000004591	PJA1	GAAGTCCCAATGCACAGATCA
TRCN0000004592	PJA1	GCGAGGAGTGACCAAGTGAAA
TRCN0000004593	PJA1	GCCAAAGTACCCTGAAGACAA
TRCN0000004594	PJA1	CCAATCAGTCAGTTAGCCTAA
TRCN0000003865	PML	CAATACAACGACAGCCCAGAA
TRCN0000003866	PML	CACCCGCAAGACCAACAACAT
TRCN0000003867	PML	GCCAGTGTACGCCTTCTCCAT
TRCN0000003868	PML	GTGTACCGGCAGATTGTGGAT
TRCN0000003869	PML	GTGTACGCCTTCTCCATCAAA
TRCN0000006592	PRPF19	GAACGGATGTGGAAGGAAGAA
TRCN0000006593	PRPF19	CCTGTCTCTAATCATGTTTAT
TRCN0000006594	PRPF19	CCTCAAGTTCTACAGCCTGTA
TRCN0000006595	PRPF19	CGGCTCATCGAGAAGTACATT
TRCN0000006596	PRPF19	CCGATGCCACTATCAGGATTT
TRCN0000003870	PSMA1	GCAATGGAAGCTGTTAAACAA
TRCN0000003871	PSMA1	GAAAGGGTCTGTATAATCATT
TRCN0000003872	PSMA1	CTGCTGATGCTAGACTGTTAT
TRCN0000003873	PSMA1	GTTCCCAATCAGCTCGTACTT
TRCN0000003874	PSMA1	CCAGATACCAACACAACGATA
TRCN0000003875	PSMA2	AGGGCAAATGACAGAGGATAA
TRCN0000003876	PSMA2	CCATTCATACAGCCATCTTAA
TRCN0000003877	PSMA2	ACTATGTGAATGGGAAGACTT
TRCN0000003878	PSMA2	CTGTATGATGAGCGAAGTGTA
TRCN0000003879	PSMA2	AGAACCAATTACCAAGCATAT
TRCN0000003880	PSMA3	CAAGCTGCAAAGACGGAAATA
TRCN0000003881	PSMA3	GCAGTTTCATGTTAGGGTCTT
TRCN0000003882	PSMA3	AGAAATGACCTGCCGTGATAT
TRCN0000003883	PSMA3	GTACATGACGAAGTTAAGGAT
TRCN0000003884	PSMA4	GATGCTAATGTTCTGACTAAT
TRCN0000003885	PSMA4	GTACTAAATAAGACCATGGAT
TRCN0000003886	PSMA4	GCAACACTAACAAGAGAGAAT
TRCN0000003887	PSMA4	CATACTGAATTGGGTCCTTGT
TRCN0000003888	PSMA4	CTTTGGTGTTTCATTGCTGTA
TRCN0000003889	PSMA5	TGGGCTAATTGCTGATGCTAA
TRCN0000003890	PSMA5	GCATTATTATTTGGAGGAGTT
TRCN0000003891	PSMA5	CCTTTGGAGTAGCATTATTAT
TRCN0000003892	PSMA5	TCACTCATCATCCTCAAACAA
TRCN0000003893	PSMA5	AGAGGTTATCAAGGACATTTA
TRCN0000022369	PSMA6	GTAACAACAAACCAACATCAT
TRCN0000022371	PSMA6	GTTGTGTGATGACCGGAATGA
TRCN0000022372	PSMA6	TGACCGGAATGACAGCTGACA
TRCN0000022373	PSMA6	GATGACCGGAATGACAGCTGA
TRCN0000003894	PSMA7	TCGACTTTGATGGCACTCCTA
TRCN0000003895	PSMA7	TGAAAGAACAGTGCGGAAGAT
TRCN0000003896	PSMA7	GAGAAGTATGTTGCTGAAATT
TRCN0000003897	PSMA7	TCCATTCCATTTATTCACACT
TRCN0000046844	PSMA8	CAGAAATATACCCAAAGCAAT
TRCN0000046845	PSMA8	CTTCTGGTACTTATCATGCTT
TRCN0000046846	PSMA8	GTAGTAATAAACAGAGCCCGT
TRCN0000046847	PSMA8	TGGTGGAAGAAACATTGAACT
TRCN0000003898	PSMB1	GAAGCAAGACTAAAGATGTAT
TRCN0000003899	PSMB1	CGGATCTGCATAGTGACCAAA
TRCN0000003900	PSMB1	TGCTCTTATCACCAATCAGTT
TRCN0000003901	PSMB1	GCGGCTGGTGAAAGATGTCTT
TRCN0000003902	PSMB1	GCTTTGATCCAGTAGGGTCTT
TRCN0000003935	PSMB10	GATCACAAAGACTGGCGCCAA
TRCN0000003936	PSMB10	CGGACAAGAGCTGCGAGAAGA
TRCN0000003937	PSMB10	ATACGCGAGCCACTAACGATT
TRCN0000003903	PSMB2	TATTACATGGACTACCTGGCA
TRCN0000003904	PSMB2	AGATGCGAAATGGATATGAAT
TRCN0000003905	PSMB2	GCAGCTAACTTCACACGCCGA
TRCN0000003906	PSMB2	ACCGATACTACACACCGACTA
TRCN0000003907	PSMB2	CGCACTCTTGATAAATGGTTA
TRCN0000003908	PSMB3	GATCAAACCTTATACCCTCAT
TRCN0000003909	PSMB3	CTGTATGAGTTGAAGGAAGGT
TRCN0000003910	PSMB3	GTCGGCAGATCAAACCTTATA
TRCN0000003911	PSMB3	CACCTGCGCCGAACAAATGTA
TRCN0000003912	PSMB4	ATGGTGATTGATGAGGAGCTT
TRCN0000003913	PSMB4	GTGTTGAAATAGAGGGACCAT
TRCN0000003914	PSMB4	TGCGAGTCAACAACAGTACCA
TRCN0000003915	PSMB4	CCGCAACATCTCTCGCATTAT
TRCN0000003916	PSMB5	TCTGGCTCTGTGTATGCATAT
TRCN0000003917	PSMB5	CGAAATAAGGAACGCATCTCT
TRCN0000003918	PSMB5	CCAGACGGTGAAGAAGGTGAT
TRCN0000003919	PSMB5	CAATGTCGAATCTATGAGCTT
TRCN0000003920	PSMB5	CCCATCCTCCATCCTATTTAT
TRCN0000003921	PSMB6	CGGGAAGGCATGACCAAGGAA
TRCN0000003922	PSMB6	CAGATACCCAAATTCGCCGTT
TRCN0000003923	PSMB6	CAATAAGAGATGCCCTGTACT
TRCN0000003924	PSMB6	ACACCTATTCACGACCGCATT
TRCN0000003925	PSMB6	ACTGACAAGCTGACACCTATT
TRCN0000003926	PSMB7	CACCTCTACAGCATCTATCCT
TRCN0000003927	PSMB7	ACATTGGTGCAGCCCTAGTTT
TRCN0000003928	PSMB7	GAGCATTGAGGCCCAGTAAGA
TRCN0000003929	PSMB7	AGACACAGACATGACAACCCA
TRCN0000007268	PSMB8	CCACGTTAAGTCCAAGGAGAA
TRCN0000007269	PSMB8	CCACTCACAGAGACAGCTATT
TRCN0000007270	PSMB8	CCTTTAGATGACACGACCCTA
TRCN0000007271	PSMB8	CCTCTCTATGGGCAGTATGAT
TRCN0000007272	PSMB8	GTTGGGTGAAAGTAGAAAGTA
TRCN0000003930	PSMB9	CATCGAGTCATCTTGGGCAAT
TRCN0000003931	PSMB9	CGCTTCACCACAGACGCTATT
TRCN0000003932	PSMB9	GTAATAAACTCTCTAGGGCCA
TRCN0000003933	PSMB9	CTTTATCTATGGTTATGTGGA
TRCN0000003934	PSMB9	GCTGCAAATGTGGTGAGAAAT
TRCN0000050503	PSMC1	CCAAAGCAGTAGCAAACCAAA
TRCN0000050504	PSMC1	GCACCGTCCATCGTGTTTATT
TRCN0000050505	PSMC1	GAACTTATTCAGAAGTACCTA
TRCN0000050506	PSMC1	GTCACAGTGATGAAGGTAGAA
TRCN0000050507	PSMC1	GAACACTACGTCAGCATTCTT
TRCN0000007181	PSMC2	CCTGAAGGCTTTCAAGTGAAA
TRCN0000007182	PSMC2	GCGTGCTTCATTCGAGTTATT
TRCN0000007183	PSMC2	GCCAGGGAGATTGGATAGAAA
TRCN0000007184	PSMC2	GCCTGCCTTATCTTCTTTGAT
TRCN0000007185	PSMC2	CCTAAGATTGACCCAACAGTT
TRCN0000020229	PSMC3	CCAAGCCATGAAGGACAAGAT
TRCN0000020230	PSMC3	GTGCAGATGTTCATTGGAGAT
TRCN0000020231	PSMC3	CCAGCCCAACACCCAAGTTAA
TRCN0000020232	PSMC3	CACGGAGCAATACAGTGACAT
TRCN0000020233	PSMC3	GCTCCTGGATGTTGATCCTAA
TRCN0000052038	PSMC4	GCCGCCAGAAGAGATTGATTT
TRCN0000052039	PSMC4	CCGCTGGTCATCGGACAATTT
TRCN0000052040	PSMC4	GAAAGCATACAAGACTGTCAT
TRCN0000052041	PSMC4	CATCATCTTCATAGACGAGAT
TRCN0000052042	PSMC4	CTCCACTATCACTAGCAAGAT
TRCN0000020259	PSMC5	GCACAGAGGAACGAACTAAAT
TRCN0000020260	PSMC5	CAAGGTTATCATGGCTACTAA
TRCN0000020261	PSMC5	GAAGATTCATTCTCGGAAGAT
TRCN0000020262	PSMC5	CAAACAGATCAAGGAGATCAA
TRCN0000020263	PSMC5	TGCTCCATCTATCATCTTCAT
TRCN0000050598	PSMC6	CCTCTTACAAACCCAGAGTTA
TRCN0000050599	PSMC6	CCCATTACAAAGCATGGTGAA
TRCN0000050600	PSMC6	CCAGAGTTATTTCAGCGTGTA
TRCN0000050601	PSMC6	GCTGGAGTCTAAATTGGACTA
TRCN0000050602	PSMC6	CATTGGTGAAAGTGCTCGTTT
TRCN0000058103	PSMD1	GCAGCCTTAGTGGCATCTAAA
TRCN0000058104	PSMD1	CCCAGAACCATTTGAGTATAT
TRCN0000058105	PSMD1	GCACGTCAAGATGTTTATGAT
TRCN0000058106	PSMD1	GCTGTAAGTGATGTTAATGAT
TRCN0000058107	PSMD1	GCATCATCATTCTGAAGGATA
TRCN0000058074	PSMD10	GCTCAAGTGAATGCTGTCAAT
TRCN0000058075	PSMD10	CAAGGGTAACTTGAAGATGAT
TRCN0000058076	PSMD10	CCAGTGAATGATAAAGACGAT
TRCN0000058077	PSMD10	GAAGAGTTGAAGGAGAGTATT
TRCN0000003946	PSMD11	GAGTACAGATTGAACACATAT
TRCN0000003947	PSMD11	CCTCATTTGGTGCATCTGTAT
TRCN0000003948	PSMD11	CTGGTGTCTTTGTACTTTGAT
TRCN0000003949	PSMD11	GCAAGTCAAAGAGCAGAGCAT
TRCN0000003950	PSMD11	CCGACGTGGAAAGGAAATTAT
TRCN0000058058	PSMD12	GCCAAGTATTATACTCGGATA
TRCN0000058059	PSMD12	CCTTCCTATCAAACTTCGATT
TRCN0000058060	PSMD12	CCGAATAAGTGGTGACAAGAA
TRCN0000058061	PSMD12	CCTAGCTGTGAAGGATTACAT
TRCN0000058062	PSMD12	GTAGACAGATTAGCAGGAATT
TRCN0000058108	PSMD13	GCAGCCTGATTTAGCAGCTAA
TRCN0000058109	PSMD13	CCCAAGGAGATGGTCTCATTA
TRCN0000058110	PSMD13	CAGGTTACAAAGGAAACAATT
TRCN0000058111	PSMD13	GAAATCATTCTTCACGTAGTT
TRCN0000058112	PSMD13	TGGCTGATTGACACCCTCTAT
TRCN0000006455	PSMD14	GTTGGCTTTCTGGTGTGGATA
TRCN0000006456	PSMD14	CAAGCCATCTATCCAGGCATT
TRCN0000006457	PSMD14	CATGGACTAAACAGACATTAT
TRCN0000058088	PSMD2	CCACATTTGTAGCGAACACTT
TRCN0000058089	PSMD2	GCTGGCTCAAATCGTGAAGAT
TRCN0000058090	PSMD2	CCCTATAACATGGCCCACAAT
TRCN0000058091	PSMD2	CGAAACATTATTCTAGGCAAA
TRCN0000058092	PSMD2	GAGGATAAACAGCTTCAAGAT
TRCN0000058118	PSMD3	GCAGGGCTTCTTCACTTCAAA
TRCN0000058119	PSMD3	GCTGCGGAATTACCTACACTA
TRCN0000058120	PSMD3	CCCTATTTCCTTCTGACTCAA
TRCN0000058121	PSMD3	GCCGCAAAGTGTTACTATTAT
TRCN0000058122	PSMD3	CCATGAGGTTTCCTCCCAAAT
TRCN0000003938	PSMD4	CCGACAAGGCAAGAATCACAA
TRCN0000003939	PSMD4	CCTGAGAACAACGTGGGCCTT
TRCN0000003940	PSMD4	GCACGGAATATAGGGTTAGAT
TRCN0000058113	PSMD5	CCCTGTCAAGAATATCACTAA
TRCN0000058114	PSMD5	CCCTGCTTAACGAGAACCATA
TRCN0000058115	PSMD5	CCATACTATGTGAAACCTGTT
TRCN0000058116	PSMD5	GCTGTCATGGATAGTCCTCAA
TRCN0000058117	PSMD5	CCTGTATAGAAATGGTGACAT
TRCN0000058063	PSMD7	GCTGAGGAAGTTGGAGTTGAA
TRCN0000058064	PSMD7	GCCATCAACGAACTCATGAAA
TRCN0000058065	PSMD7	CCTGCACAACCTCATCAACAA
TRCN0000058066	PSMD7	GATGACAAAGACGATTCTGTA
TRCN0000058098	PSMD8	CGACACTATCAGGGATGAGAT
TRCN0000058099	PSMD8	GCTGACCAAACAGCAGCTAAT
TRCN0000058100	PSMD8	GCCAAACAGGTCATCGAGTAT
TRCN0000058101	PSMD8	CCCAGCTCAAATGCTACTACT
TRCN0000058102	PSMD8	GATGACAGACTACGCCAAGAA
TRCN0000003941	PSMD9	ACCAGCTTAGACTTGTTCCAA
TRCN0000003942	PSMD9	GCGCAGATCAAGGCCAACTAT
TRCN0000003943	PSMD9	GCATGTTCTAATTCCACGTAT
TRCN0000003944	PSMD9	CGGCGCAAGGAGGAGATAGAA
TRCN0000003945	PSMD9	GCGGGTCTGCAAGTGGATGAT
TRCN0000058078	PSME1	CGCAATGCTTATGCTGTGTTA
TRCN0000058079	PSME1	GCCCAGTGAACTGCAATGAAA
TRCN0000058080	PSME1	CGGATTGAGGATGGTAACAAT
TRCN0000058081	PSME1	CCTGATCCAGTCAAGGAGAAA
TRCN0000058082	PSME1	GCTTCCACACTCAAATCTCTA
TRCN0000058093	PSME2	CCCAAGATTGAAGATGGAAAT
TRCN0000058094	PSME2	CCAAGGATGATGAGATGGAAA
TRCN0000058095	PSME2	CCAGACAACCATTTCCAAGTA
TRCN0000058096	PSME2	CTACAGATTCTTGCCACAGAA
TRCN0000058097	PSME2	CCAGAAGTCTGGACTCTCAAA
TRCN0000058068	PSME3	GCATCTTATCTGGACCAGATT
TRCN0000058069	PSME3	CGTGACAGAGATTGATGAGAA
TRCN0000058070	PSME3	CGAAGGTTGGATGAGTGTGAA
TRCN0000058072	PSME3	GAACCAATCTTAAACATCCAT
TRCN0000034229	PSMF1	GCTGGGTGGAACAACAATAAA
TRCN0000034230	PSMF1	GTCTGGAATCATCACACCTAT
TRCN0000034232	PSMF1	GCACTTATTGACCCTTCCTCA
TRCN0000034233	PSMF1	CCCTGAACTTGGATGATTATA
TRCN0000003467	RAD18	CCCTCGACATCCACTTTGAAA
TRCN0000003468	RAD18	TGCTTCGAGTATTTCAACATT
TRCN0000003469	RAD18	GAACCAAGAAACAAGCGTAAT
TRCN0000003470	RAD18	GCCCAAGGAAAGATGCTAAAT
TRCN0000005972	RAD23A	CCCTACCCTTATTCCATGAAA
TRCN0000005973	RAD23A	GATGTCCCTATCAGGGACTAT
TRCN0000005974	RAD23A	GCAGACCTTCAAGATCCGCAT
TRCN0000005975	RAD23A	AGGCCTATTTCGCGTGTGAAA
TRCN0000005976	RAD23A	GAAGAACTTTGTGGTCGTCAT
TRCN0000003951	RAD23B	CCAGCGTTACTACAGCAGATA
TRCN0000003952	RAD23B	GTGTACTAGATCCAGAAACTT
TRCN0000003953	RAD23B	AGAAGCTGGAAGTGGTCATAT
TRCN0000003954	RAD23B	CTCCAGCATCAGCGACAGCAT
TRCN0000003955	RAD23B	CAGCAGATAGGTCGAGAGAAT
TRCN0000022384	RBX1	CTTTCCCTGCTGTTACCTAAT
TRCN0000022385	RBX1	CTGCATCTCTCGCTGGCTCAA
TRCN0000022387	RBX1	ACTGCATCTCTCGCTGGCTCA
TRCN0000022388	RBX1	ATGTCAAGCTAACCAGGCGTC
TRCN0000004088	RCHY1	TGCTTTAGATATGACCAGGTA
TRCN0000004089	RCHY1	GCTCAATTAGGGCAGTATCAT
TRCN0000004090	RCHY1	CCCGTGTTGTTGCTCATGTCT
TRCN0000004091	RCHY1	GCAATGACTGTAATGGACGAT
TRCN0000034074	RFFL	CCGGCTATACAAGGATCAGAA
TRCN0000034076	RFFL	CCATGACATCTCTACCGAAAT
TRCN0000034077	RFFL	ACCTGCTTGGACTGTAAGAAA
TRCN0000034078	RFFL	GCAGTATGTAATCCGAGCTGT
TRCN0000006436	RFP	CCACATAATGATTATGGCTAT
TRCN0000006437	RFP	CAGGGCTGAAAGAATCAGGAT
TRCN0000006438	RFP	GAATTAAGAGAGGCTCAGTTA
TRCN0000006439	RFP	GAGAAGATTGTTTGGGAGTTT
TRCN0000034254	RFP2	CCCTATTTGTTGTAGTCTGTT
TRCN0000034255	RFP2	GCTGTCTTTCAAACTTCACTT
TRCN0000034256	RFP2	GCCAGTATGCAAAGGACACTT
TRCN0000034257	RFP2	GCCGTAAGGAAACTTCAGCTA
TRCN0000034258	RFP2	CTTGCTGTTATGCAAGCATAT
TRCN0000033690	RFPL1	CCACCTAATGGTGATAAGAGT
TRCN0000033691	RFPL1	TGATAAGAGTGTCTTGAGTAT
TRCN0000033692	RFPL1	GTCTGCTTCAAGTGCATCAAT
TRCN0000033693	RFPL1	CGAGAGATTTGACGTGTCCAT
TRCN0000033759	RFPL2	CGTCTGCCTCAAGTGCATTAA
TRCN0000033760	RFPL2	GCTTTGCTGTTACTCTTCCAT
TRCN0000033761	RFPL2	CTCTTCGTAGACCGCAAGTTA
TRCN0000033762	RFPL2	GTCTATACATTCAGGAGCGTA
TRCN0000033763	RFPL2	GCTGAAGAAGATTCTGCAGAT
TRCN0000033754	RFPL3	GCTCCTTCAATTCCACCTAAT
TRCN0000033755	RFPL3	CCGCTGACTTTCCTCTTAGTA
TRCN0000033756	RFPL3	CCCAAGCTGAAGAAGATTCTA
TRCN0000033757	RFPL3	GCTTTGCTGTTGCTGTTCCAT
TRCN0000029719	RFWD2	CCACCATCAATGTAACTCCAT
TRCN0000029720	RFWD2	CCTTGGTATAATAGCACGTTA
TRCN0000029721	RFWD2	GCTAACAGTCAGGGTACAATT
TRCN0000029722	RFWD2	GCAGCCCAACTACAGATTCTT
TRCN0000029723	RFWD2	GCTGGAGTTACAAAGAAGATT
TRCN0000004139	RNF12	GTAAATAACCTGAGTGAAGAA
TRCN0000004140	RNF12	GAATATACAGAAGGCAACAAA
TRCN0000004141	RNF12	GAGATAGCATAGCCAGCAGAA
TRCN0000004142	RNF12	GCTGATATAGTGATGGGCAAA
TRCN0000004143	RNF12	GCTCAGTCTCAAATCGAAATA
TRCN0000033894	RNF123	GCGCTACTATTGGGATGAATA
TRCN0000033895	RNF123	GCGGATTATATCAGTGCCGAT
TRCN0000033896	RNF123	CCCTCAAAGATGACCTTGCTT
TRCN0000033898	RNF123	GCCAGAACATTTGGACCAGTT
TRCN0000004794	RNF128	GTGCTTATATTGATCTGGAAT
TRCN0000004795	RNF128	CCGCATCATCTGGATATGCTT
TRCN0000004796	RNF128	CGCTGATAGAAAGAGGTAATT
TRCN0000004797	RNF128	GCAGTGGATGTTATTCCTCAT
TRCN0000004798	RNF128	GCTGTGTGCATTGAATTGTAT
TRCN0000007726	RNF130	GAACCTATTTTTGTGCATCAT
TRCN0000007727	RNF130	CCTGGCTTAGTGAACATTGTA
TRCN0000007728	RNF130	GCTGTAGTCATCTACAATAAT
TRCN0000007729	RNF130	CCTGGGAATTGTGCCGAATTT
TRCN0000007730	RNF130	CGGTTCTTTGTCCCTCCTAAT
TRCN0000011147	RNF133	CCCATGTTTCATCAGGCATTT
TRCN0000011148	RNF133	GCCTAATGACATAGTTCGTAT
TRCN0000011149	RNF133	CGTTGTGGTTATGATTGGTAA
TRCN0000011150	RNF133	CCCATTTGCAAATGTGATATT
TRCN0000011151	RNF133	GCATGTAATCCCAATACCATT
TRCN0000033999	RNF135	CTTACCTTATGTGCCTTTCTT
TRCN0000034000	RNF135	CATCCATCCAACCTTTAACTT
TRCN0000034001	RNF135	GCAGTAGAGAAGAGCATCACA
TRCN0000034002	RNF135	GTGGACAATCAGGAGAAGCTT
TRCN0000034003	RNF135	CTCTTGTTGTGTGGAATGGAA
TRCN0000033774	RNF139	CCAGACATACTACGAGTCTTT
TRCN0000033776	RNF139	CCTTTCTGTTAGCTGCAACTT
TRCN0000033777	RNF139	GCTCGTATTACACCGTGTAAT
TRCN0000033778	RNF139	CCACACGATATGTTTATCTTT
TRCN0000003442	RNF14	AGGTATGGTAAGAGAGTGATT
TRCN0000003443	RNF14	CCACCTTCATTCACACTTAGT
TRCN0000003444	RNF14	CCCAAAGCTCTGAATAGTTAA
TRCN0000004413	RNF144	GAACGAGATTGAGTGCATGGT
TRCN0000004414	RNF144	CGATGATTTCCTTCTGATACA
TRCN0000004415	RNF144	CCTTCTGATACACTACGATAA
TRCN0000004416	RNF144	GCTGTGATGGTGTCTACTGTT
TRCN0000004417	RNF144	CCACTCCCTTTGTACTTTGCT
TRCN0000004799	RNF148	CTGAAGATGTAACCAGATCTT
TRCN0000004800	RNF148	CCCAAGATGTAGTACGCATTT
TRCN0000004801	RNF148	GCCATTACATCATGTATCTAT
TRCN0000004802	RNF148	GTGATGATAAGCAACCTGAAA
TRCN0000004803	RNF148	GTTTGCTTTGACACATACAAA
TRCN0000007763	RNF152	CCCTGTAGTATAGTACGTGAT
TRCN0000007764	RNF152	CTTCACAACATGTCTTGCATT
TRCN0000007765	RNF152	TCATCGCCATTCCACACACTT
TRCN0000007766	RNF152	GCCCAAGTTGCTGGACTGCAA
TRCN0000007767	RNF152	CGGTCTTCATCAAACTTCCCA
TRCN0000016739	RNF157	GCAGAGGGAAATGATGTTATA
TRCN0000016741	RNF157	CATCCCGTCTAATTCCGTGTA
TRCN0000016742	RNF157	GCCACGGAAGAGTTCCAGAAT
TRCN0000004804	RNF19	GCCGGGTTTCATTATCATAAT
TRCN0000004805	RNF19	CCCATGATATTCGCTTGATAT
TRCN0000004806	RNF19	CGCAAGATTCACAATCGCTAT
TRCN0000004807	RNF19	GCCATCCAAATTCAGGCACAA
TRCN0000004808	RNF19	CCTGATATAATGACTTGTCAT
TRCN0000033694	RNF2	GCACCTACAAAGGAGCACAAA
TRCN0000033695	RNF2	CCTAGTAACAAACGGACCAAA
TRCN0000033696	RNF2	CGAAGTCTACACAGTGAATTA
TRCN0000033697	RNF2	GCCAGGATCAACAAGCACAAT
TRCN0000033698	RNF2	GCTGTGAGGTTAGCTTTAGAA
TRCN0000033874	RNF20	CCTGAGATATAAGCGGAAATT
TRCN0000033875	RNF20	CCGTGCTGTAACATGCGTAAA
TRCN0000033876	RNF20	CCACTGATGATGCCTCACTAT
TRCN0000033877	RNF20	GCCAATGAAATCAAGTCTAAA
TRCN0000033878	RNF20	CGGAGGAACTAGACATTAGAA
TRCN0000004600	RNF25	GAGGACCAGGATTCACAGTAT
TRCN0000004601	RNF25	GATGAACTACAGGTGATTAAA
TRCN0000004602	RNF25	TGGGAGGGAGGCAATAAAGAT
TRCN0000004603	RNF25	GAAACCCAGAAAGCTATGCTA
TRCN0000004604	RNF25	CAGGTCAAATCAGCAAAGGTT
TRCN0000033924	RNF26	CCTTGTGTACTCTGCTGTATA
TRCN0000033926	RNF26	CCCTTGGAAATTGCTGAAGGA
TRCN0000033927	RNF26	CTTGCTTTCATTGCTGGCCTT
TRCN0000033928	RNF26	CCTGGTGGCTTATGTGATCAA
TRCN0000033949	RNF34	CCCTCAGTTAATGCGACTGAA
TRCN0000033950	RNF34	GCCTTGATGATGTGGAAGGAA
TRCN0000033951	RNF34	CGGCACAGGTACAAAGTGAAA
TRCN0000033952	RNF34	GCAGTATCTCATTCTGAGAAA
TRCN0000033953	RNF34	GCATGTTTGCTGTGACTGCAA
TRCN0000073083	RNF39	CGCCCATTGCAGGAGTATTAA
TRCN0000073084	RNF39	CCAACATCCAAGTCATCTAAT
TRCN0000073085	RNF39	GACGATTTGAAGTCCCAACAT
TRCN0000073086	RNF39	GAGGATGATCTCCCTGAAGAT
TRCN0000073087	RNF39	GAGAGGATATGAGGAAGACAT
TRCN0000017053	RNF4	CGGGCTTCTGACTGCTCCATA
TRCN0000017054	RNF4	CCCATACTCCCAGAAACGCCA
TRCN0000017055	RNF4	CTACCCATACTCCCAGAAACG
TRCN0000017056	RNF4	CATACTCCCAGAAACGCCAGG
TRCN0000017057	RNF4	CCATACTCCCAGAAACGCCAG
TRCN0000004780	RNF40	GCTGTGATCTACCCTAGAGAA
TRCN0000004781	RNF40	CGCATCGAGTTTGAGCAGAAT
TRCN0000004782	RNF40	GCAGCTTAACTCTGGCTACTA
TRCN0000004783	RNF40	CGCCACCTGATTAGTAGTCTT
TRCN0000004784	RNF40	GCAGAAGTTTGAGATGCTGAA
TRCN0000034249	RNF41	CCGACGCTACTATGAGAACTA
TRCN0000034250	RNF41	CCCTATTTGCAGTGGAGTCTT
TRCN0000034251	RNF41	CCTGGAGGAGACAATTGAATA
TRCN0000034252	RNF41	CGAAGATCTTATCTGCCCTAT
TRCN0000034253	RNF41	GCCAGGCCTTGTCATGATATT
TRCN0000004785	RNF5	GAGTGTCCAGTATGTAAAGCT
TRCN0000004786	RNF5	ATCAGCAGAGAGAAGGTTGTC
TRCN0000004787	RNF5	AGTATGTAAAGCTGGGATCAG
TRCN0000004788	RNF5	CGGCAAGAGTGTCCAGTATGT
TRCN0000038804	RNF7	CCCAACTCTTACTCTTAATTT
TRCN0000038805	RNF7	CGACAAGATGTTCTCCCTCAA
TRCN0000038806	RNF7	CCTGTGGGTGAAACAGAACAA
TRCN0000038808	RNF7	CCTCAAGAAGTGGAACGCGGT
TRCN0000004102	SENP6	CCGTGTTACCTTTCTCTATTA
TRCN0000004103	SENP6	GACAGAACTAACAGAAGAGAA
TRCN0000004104	SENP6	CACAGGATTAACAACCAAGAA
TRCN0000004105	SENP6	CTACAGGAAGATCAGAGCAAA
TRCN0000004543	SENP7	AGTGCAGCTTATTATTCTCAA
TRCN0000004544	SENP7	GCAGTGATTGTGGAGTATATT
TRCN0000004545	SENP7	GTCGAATATGTCAGTACCAAA
TRCN0000004546	SENP7	CGGTTGCTACTCCCTTTCTAT
TRCN0000004547	SENP7	CCCAGAGTTATATTGACGAAT
TRCN0000073338	SENP8	CCTAACTTCATTCAAGACCTA
TRCN0000073339	SENP8	GCTGGCTCAATGACCATATTA
TRCN0000073340	SENP8	CCCTGCATACATCACAAAGAA
TRCN0000073341	SENP8	CCCAACAAGAGAGTTGTATTT
TRCN0000073342	SENP8	GACTGTGGGATGTACGTGATA
TRCN0000083693	SHFM1	CCAGAAGAAGTGTTGAAGTAA
TRCN0000083694	SHFM1	GAACTAGAGAAACATGGTTAT
TRCN0000083695	SHFM1	GCTGAACTAGAGAAACATGGT
TRCN0000083696	SHFM1	GTAGAGGATGACTTCTCTAAT
TRCN0000083697	SHFM1	GCTGGCTTAGATGAAGATGAA
TRCN0000003961	SIAH1	GTCGCCCAAAGCTCACATGTT
TRCN0000003962	SIAH1	TCACCAGCAGTTCTTCGCAAT
TRCN0000003963	SIAH1	CACACCTTTGAGCTTAATCTT
TRCN0000003964	SIAH1	CCCTGTAAATATGCGTCTTCT
TRCN0000003965	SIAH1	CTGATAGGAACACGCAAGCAA
TRCN0000007415	SIAH2	GCTGGCTAATAGACACTGAAT
TRCN0000007416	SIAH2	GCCTACAGACTGGAGTTGAAT
TRCN0000007417	SIAH2	CATACGGAGAAACCAGAACAT
TRCN0000007418	SIAH2	ACACAGCCATAGCACATCTTT
TRCN0000007419	SIAH2	CGCTAATAAACCCTGCAGCAA
TRCN0000006494	SKP1A	GCAAACTACTTAGACATCAAA
TRCN0000006495	SKP1A	CCAAACAATCTGTGACTATTA
TRCN0000006496	SKP1A	CCTGAAGATGATGAGAACAAA
TRCN0000007530	SKP2	GCCTAAGCTAAATCGAGAGAA
TRCN0000007531	SKP2	CCACGATCATTTATGGACCAA
TRCN0000007532	SKP2	CCATTGTCAATACTCTCGCAA
TRCN0000007533	SKP2	AGGCCAACTATTGGCAACAAA
TRCN0000007534	SKP2	GATAGTGTCATGCTAAAGAAT
TRCN0000003471	SMURF1	GCCCAGAGATACGAAAGAGAT
TRCN0000003472	SMURF1	CCACTTGTCTTATTTCCACTT
TRCN0000003473	SMURF1	CTGGAGGTTTATGAGAGGAAT
TRCN0000003474	SMURF1	CCGAAGGCTACGAACAAAGAA
TRCN0000003475	SMURF2	CGGTACAAGTCACATTTCATT
TRCN0000003476	SMURF2	GTGTGGATACTTGAGAATGAT
TRCN0000003477	SMURF2	CGCCTCAAAGACACTGGTTAT
TRCN0000003478	SMURF2	CCACCCTATGAAAGCTATGAA
TRCN0000057063	SOCS1	CCTACCTCTTCATGTTTACAT
TRCN0000057064	SOCS1	CGACACGCACTTCCGCACATT
TRCN0000057065	SOCS1	CTTCCGCACATTCCGTTCGCA
TRCN0000057066	SOCS1	GACACGCACTTCCGCACATTC
TRCN0000057067	SOCS1	GCACTTCCGCACATTCCGTTC
TRCN0000057073	SOCS3	CCACCTGGACTCCTATGAGAA
TRCN0000057074	SOCS3	CCGCTTCGACTGCGTGCTCAA
TRCN0000057075	SOCS3	GAAGAGCCTATTACATCTACT
TRCN0000057076	SOCS3	CGGCTTCTACTGGAGCGCAGT
TRCN0000057077	SOCS3	CTCCTATGAGAAAGTCACCCA
TRCN0000007233	SQSTM1	GCCCTCCATTTGTAAGAACAA
TRCN0000007234	SQSTM1	CGAGGAATTGACAATGGCCAT
TRCN0000007235	SQSTM1	GCAGATGAGAAAGATCGCCTT
TRCN0000007236	SQSTM1	CCGAATCTACATTAAAGAGAA
TRCN0000007237	SQSTM1	CCTCTGGGCATTGAAGTTGAT
TRCN0000073973	STAMBP	GCAATATGAATGGAGCTTATT
TRCN0000073974	STAMBP	GCATCCATTTACTCTGAGGAA
TRCN0000073975	STAMBP	CCAGAGTCAGTAGCCATTGTT
TRCN0000073976	STAMBP	TCCAGGAAACTGGATTCTTTA
TRCN0000073977	STAMBP	CACAACTGTAAGGCCAGCTAA
TRCN0000073963	STAMBPL1	GCTGCTACTCTAAGTGCTGTT
TRCN0000073964	STAMBPL1	GCTTCCTAACCATCGAGATTA
TRCN0000073965	STAMBPL1	GCTTGAGGTTTCTGCTTGTAA
TRCN0000073966	STAMBPL1	GCTATGCCTGACCATACAGAT
TRCN0000073967	STAMBPL1	CCAGAACAATTCCTTGCTGAA
TRCN0000007525	STUB1	CCCAAGTTCTGCTGTTGGACT
TRCN0000007526	STUB1	GAAGAGGAAGAAGCGAGACAT
TRCN0000007527	STUB1	GACGCATTCATCTCTGAGAAT
TRCN0000007528	STUB1	GCAGTCTGTGAAGGCGCACTT
TRCN0000007529	STUB1	CGCGAAGAAGAAGCGCTGGAA
TRCN0000034004	SYVN1	TGAATGCTTAATCCCGGGAAA
TRCN0000034006	SYVN1	GCTCACGCCTACTACCTCAAA
TRCN0000034007	SYVN1	GACCGTGTGGACTTTATGGAA
TRCN0000022124	TCEB1	CTGTAGTTCAGTTAGTAACTT
TRCN0000022125	TCEB1	GCCATGTATGTCAAATTGATA
TRCN0000022126	TCEB1	GCACCTGAAATTGCACTGGAA
TRCN0000022127	TCEB1	CGAAACCAATGAGGTCAATTT
TRCN0000022128	TCEB1	CGTACAAGGTTCGCTACACTA
TRCN0000007661	TCEB2	CTCTTGGATGATGGCAAGACA
TRCN0000007662	TCEB2	GCAGCGGCTGTACAAGGATGA
TRCN0000014998	TCEB3	CTGAGGACTTGCCTTGGAAAT
TRCN0000014999	TCEB3	CCTGCCTATTACAGTAGACAT
TRCN0000015000	TCEB3	GCAGGTGTATTCTGGTTCCAA
TRCN0000015001	TCEB3	GCTTCAGACAACCACCTGAAA
TRCN0000015002	TCEB3	CGCCAGTAGCATCAGCTTTAA
TRCN0000007515	TOPORS	CCCTTTGGACAGTCTTTATTT
TRCN0000007516	TOPORS	CCACTATGTAAACAGCCCTTT
TRCN0000007517	TOPORS	GCAGAAATAGAGATCGTTATT
TRCN0000007518	TOPORS	GCGATGTTAGTAGATGCTCAT
TRCN0000007519	TOPORS	CCTGATTCTAAGTGTCCTATA
TRCN0000004571	TRAF2	CCCTTGCAGATTCCACGCCAT
TRCN0000004572	TRAF2	CTCGGGCATGACAGGCAGAAA
TRCN0000004573	TRAF2	CGAGACGGTAGAGGGTGAGAA
TRCN0000004574	TRAF2	CCCTGAAAGAATACGAGAGCT
TRCN0000007348	TRAF6	GCCACGGGAAATATGTAATAT
TRCN0000007349	TRAF6	CGGAATTTCCAGGAAACTATT
TRCN0000007350	TRAF6	CGAAGAGATAATGGATGCCAA
TRCN0000007351	TRAF6	CCCATCTGCTTGATGGCATTA
TRCN0000007352	TRAF6	CCTGGATTCTACACTGGCAAA
TRCN0000056948	TRAF7	CGGGACGCATCCATGTTAAAT
TRCN0000056949	TRAF7	CTACTCCATTGCTGTGACAAA
TRCN0000056950	TRAF7	GCACTGTGAAGGTTTGGACTT
TRCN0000056951	TRAF7	GACCAGAATGGAAACGACCTT
TRCN0000056952	TRAF7	GCTGGGAAAGCTCTCGGAGAA
TRCN0000003464	TRIAD3	CAACAACTTCCCACTCAACAT
TRCN0000003465	TRIAD3	TCAGATGTATTTCAAGGACTA
TRCN0000003466	TRIAD3	GACACTATGCAATCACCCGAA
TRCN0000007634	TRIM10	CGGGATAGAAATGACTGCTTT
TRCN0000007635	TRIM10	GCACTCTAATAAGATGTGAAA
TRCN0000007636	TRIM10	GCTAACGTGGTGGAGAACATT
TRCN0000007638	TRIM10	CTATGCTTTGAGTTGGACTAT
TRCN0000033959	TRIM11	GCTATTCATCTTTCCCGAGAT
TRCN0000033960	TRIM11	GCTTGCTAAGATGGCCGAGAT
TRCN0000033961	TRIM11	CCTGAGCTGATCCTGTCTGAA
TRCN0000033962	TRIM11	AGCTATTACAATTCCTCGGAA
TRCN0000033963	TRIM11	CGATGGGTCACTGCTATTCAT
TRCN0000034035	TRIM15	GAGGATGTAAAGTGTCAAGAA
TRCN0000034036	TRIM15	CAGGTGTGAGATGAAGACTTT
TRCN0000034037	TRIM15	CTTGGCGCATCATCTGGAAAT
TRCN0000034038	TRIM15	CGAAAGCAAGAAGCATCAGGT
TRCN0000062848	TRIM16	CCTGCCTGTTTGTAGTAATTT
TRCN0000062849	TRIM16	CCGCATCAGGTGAACATCAAA
TRCN0000062850	TRIM16	GCCGTTGTTCAGCGCAAATAT
TRCN0000062851	TRIM16	CTGTGTGACTTCTGCCTTGAT
TRCN0000062852	TRIM16	GCCAATGTGATGCTCTTCTTA
TRCN0000033825	TRIM17	GAACGCATTGTGCTGGAGTTT
TRCN0000033826	TRIM17	GTTTGAGAAGATGAACCTCTA
TRCN0000033827	TRIM17	GACCAAGTACTTATCCACCTT
TRCN0000033828	TRIM17	ACAGTGACCATGTGGGTGAAA
TRCN0000073033	TRIM2	GCACCTTAGAACTGTACTATA
TRCN0000073034	TRIM2	GCACATTATTGTTGTGGACAA
TRCN0000073035	TRIM2	GCATCGTGGATGACATTCATT
TRCN0000073036	TRIM2	CGCGCTCCAGAACAATTTCTT
TRCN0000073037	TRIM2	GTCAAGCAGAAAGCTGTGAAA
TRCN0000003983	TRIM21	TGAGAAGTTGGAAGTGGAAAT
TRCN0000003984	TRIM21	AGTTATCCTATGGTCCTGGGT
TRCN0000003985	TRIM21	CTGCCTTCTTTATGGGACTTA
TRCN0000003986	TRIM21	TGGCATGGTCTCCTTCTACAA
TRCN0000005899	TRIM22	CGGAGCACTCATCTACAAGTT
TRCN0000005900	TRIM22	GTCACCAAACATTCCGCATAA
TRCN0000005901	TRIM22	CAATGAAATGAGAGTCATCTT
TRCN0000034204	TRIM23	GCTTGGAAGAAGGTTGTCAAA
TRCN0000034205	TRIM23	CGAAGTGGTATGGGACTGTAT
TRCN0000034206	TRIM23	GCCCATTTGATCGACAAGTAA
TRCN0000034208	TRIM23	GCAGTCATAGAGACAGAATTA
TRCN0000003445	TRIM25	GAGTGAGATCCAGACCTTGAA
TRCN0000003446	TRIM25	CCAGCTCACATCCGAACTCAA
TRCN0000003447	TRIM25	ACAACAAGAATACACGGAAAT
TRCN0000003448	TRIM25	GAACTGAACCACAAGCTGATA
TRCN0000003449	TRIM25	GTGCCCGATTCCTCTTAGAGA
TRCN0000004047	TRIM26	ACACCGAGAGAAGCTGCACTA
TRCN0000004048	TRIM26	CTGGAGCTATCTGTGGTCTTA
TRCN0000004049	TRIM26	GCTGAGAGACTTGGAATATAA
TRCN0000004050	TRIM26	GCTGCTGAGAGACTTGGAATA
TRCN0000004051	TRIM26	GATGGATATGACGACTGGGAA
TRCN0000016348	TRIM29	CGGCCATTCTACGTCAACAAA
TRCN0000016349	TRIM29	CGACAAGAACTCCAACTACTT
TRCN0000016350	TRIM29	GCAGGAATTTGGTGCATTGAT
TRCN0000016351	TRIM29	CCACGTTGAGAAGATGTGCAA
TRCN0000016352	TRIM29	CCATCGCTATGTGAACAACTA
TRCN0000033744	TRIM3	CCACGGTTGCACTTTATTTAT
TRCN0000033745	TRIM3	GCTGTGAACAACAAGAATGAA
TRCN0000033746	TRIM3	GACATAATTGTGGCAGACTAT
TRCN0000033747	TRIM3	GACCACAAGAATGGCACATAT
TRCN0000033748	TRIM3	GCCAAACAGAAGGTGTTGCAA
TRCN0000033769	TRIM31	GCCACAGTTGAACGATCTCAA
TRCN0000033770	TRIM31	CCTGGCCTCTTATGATGAGAT
TRCN0000033771	TRIM31	CGTGAATCCAAGGACCACAAA
TRCN0000033772	TRIM31	GCTCTCAGGATACGAAGACAT
TRCN0000033773	TRIM31	CCTCAAATGCATCACTCAGAT
TRCN0000003455	TRIM32	CAGGCAAGGTATAAAGCAGTT
TRCN0000003456	TRIM32	CCATTTCTCTATCAAGCATTA
TRCN0000003457	TRIM32	CAGTGCTAAAGATCATTGATA
TRCN0000003458	TRIM32	TCTTGGACTGTTGGGATCATT
TRCN0000005892	TRIM34	CGGAGGAAGTATTCAAGGAAT
TRCN0000005893	TRIM34	CGCCATATGAAGTATGTTGTT
TRCN0000005894	TRIM34	GCAGGACATGAGTGGAATCAT
TRCN0000005895	TRIM34	GTGTGGTATCAGTTACTCATT
TRCN0000033779	TRIM35	CATGAAACACAAGAGCCGAAA
TRCN0000033780	TRIM35	CTTGCATCTGTGGAATCTGTA
TRCN0000033781	TRIM35	AGTGTCAAGGAAGAACTGGAT
TRCN0000033782	TRIM35	CGCGTCTGGAAGAAGATGCTT
TRCN0000040288	TRIM36	CGAGGAATCAATGGTCTGTTT
TRCN0000040289	TRIM36	GCTGGATTTAATCTTCTGCTT
TRCN0000040290	TRIM36	CCATTGATTCTCCCTTGCCAA
TRCN0000040291	TRIM36	CTAGCGATAAACTACAAGAAT
TRCN0000040292	TRIM36	GCCTTGATAAATTGGCACCAT
TRCN0000034210	TRIM37	CCAGTGTAGCAGGTAGTCTAT
TRCN0000034211	TRIM37	GCTAATGCTAAAGGAGGTCAT
TRCN0000034212	TRIM37	CCGTTTGGACTTACTCGCAAA
TRCN0000034213	TRIM37	CCACAGCATCATATTCTCGAA
TRCN0000007570	TRIM38	CCTGAGAAACAGCCAAGCAAA
TRCN0000007571	TRIM38	CCACATCTTTACTTTCCCGAA
TRCN0000007572	TRIM38	CCGGATGGGATTTAGGAGTTT
TRCN0000007573	TRIM38	GCTGAAGAGCAATGAACTCAA
TRCN0000007574	TRIM38	GCCCTCAAAGAGACGGATCAA
TRCN0000033879	TRIM39	GTAGGCATATTCCTAGACTAT
TRCN0000033880	TRIM39	CCGCTCTCATATCTACACCTT
TRCN0000033881	TRIM39	CGAGATGCTTAAGGATGTCAA
TRCN0000033882	TRIM39	CGATGCTACACAGGAGTACAA
TRCN0000033883	TRIM39	GTCCTGTCTGTCGAAAGACAT
TRCN0000034029	TRIM4	CGCTTCATTGAAGAAGCTCAT
TRCN0000034030	TRIM4	GCTGCTCTTGTACCATTCTAA
TRCN0000034031	TRIM4	GCTGAATGAGAACACGTTAAA
TRCN0000034032	TRIM4	GCGATTCCAAGTGGCTGTAAA
TRCN0000034033	TRIM4	CACCAGTGACTGATAGGAAAT
TRCN0000011142	TRIM40	CCACTACAAGGAACGACTCAA
TRCN0000011143	TRIM40	GACACCAACACACTGAAGAAT
TRCN0000011144	TRIM40	AGCGGCCAGAATCCTTGACAT
TRCN0000011146	TRIM40	CAGAAAGGACATTGCAGAACT
TRCN0000034044	TRIM41	CCCGTGAATCAACCCATCATA
TRCN0000034045	TRIM41	CGAGCGTGTCTTTCCTTTCTT
TRCN0000034046	TRIM41	GCCAATATGGTCCAGGTGATT
TRCN0000034047	TRIM41	GAGACTTTCAATAGGTGTGAA
TRCN0000034048	TRIM41	CGTCTCAGAGAGATGCATGAA
TRCN0000073248	TRIM42	CCTCAGACTCATCACAAAGTA
TRCN0000073249	TRIM42	GCAGAGATGTTGTCCTCAGTT
TRCN0000073250	TRIM42	CCCAACACAGAATACGTGTTT
TRCN0000073251	TRIM42	CCGCAATACCATCATCACTTT
TRCN0000073252	TRIM42	CAGTCCGATATGAAATTGATA
TRCN0000034094	TRIM43	CGGTTCTCCATAAGGAAGAAA
TRCN0000034095	TRIM43	CAATCACAATATCAGGCTCTT
TRCN0000034096	TRIM43	GAAGGTGGATAATCATTTCAA
TRCN0000034097	TRIM43	TGGGACCCATAGGCAAACAAA
TRCN0000034098	TRIM43	CTTCTCCTTTGGGAAACACTA
TRCN0000073078	TRIM45	CCCGTCCTGGAGTAAATGATA
TRCN0000073079	TRIM45	GCTTTGTAAGCAAACTCACTA
TRCN0000073080	TRIM45	CCAGCCAAATGTGTCCTACAA
TRCN0000073081	TRIM45	CCTGGCTCAGATCCACATAAT
TRCN0000073082	TRIM45	CCACTGGTCATGCTGTGGAAA
TRCN0000033944	TRIM46	CCCTTCGCTTTCCTAACCATT
TRCN0000033945	TRIM46	CCTGACATACATCCTGGGAAA
TRCN0000033946	TRIM46	GCTGCTGACAGAGCTTAACTT
TRCN0000033948	TRIM46	CTGGCACTATACCGTTGAGTT
TRCN0000034049	TRIM47	CCACACACCCAGCCTTCTCAT
TRCN0000034050	TRIM47	GTTTGCCTATATTGTGGATTT
TRCN0000034051	TRIM47	GCAGTGGAATGGACGCAGCTT
TRCN0000034052	TRIM47	CACCAAATCATCCCAAGCTGT
TRCN0000034053	TRIM47	CAAGAAGTCCTGCATATCCGT
TRCN0000033919	TRIM48	CCCAATTCTTACTCAGTGCTT
TRCN0000033920	TRIM48	GAGGAGCAAATGTGTGGCATT
TRCN0000033921	TRIM48	GAATGTGGAAACCACCAGAAT
TRCN0000033884	TRIM49	CCTGTGCATGAACTACTTCAT
TRCN0000033885	TRIM49	CGGAAAGAGAAGAATCAGAAT
TRCN0000033886	TRIM49	CCTAATATACACCATCCCTAA
TRCN0000033887	TRIM49	GCTGAACGAAATGTGCCATAA
TRCN0000033888	TRIM49	GCTGGAAGGATTATGTGAATT
TRCN0000005896	TRIM5	CCTGAGAACATACGGCCTAAT
TRCN0000005897	TRIM5	GCACTGTCTCATTCTTCAATA
TRCN0000005898	TRIM5	CCTGATGCAATGTGTAATATT
TRCN0000007783	TRIM50A	CGTCACTGTTTAGGAAGGTCT
TRCN0000007784	TRIM50A	CCACAAGTTCATCCGGAAGTT
TRCN0000007785	TRIM50A	CGAATCGTCAATGAGTCGGAT
TRCN0000007786	TRIM50A	GCAGGGCGAACTCACCTTCTT
TRCN0000007787	TRIM50A	GCTTCAGTGTCCCATCTGCCT
TRCN0000034179	TRIM50C	CCATGAGTTCATCTGGAAGTT
TRCN0000034180	TRIM50C	CGTCAATGAGTCGGATGTCTT
TRCN0000034181	TRIM50C	GTGCTGGAACAGTTCGGAAAT
TRCN0000034182	TRIM50C	AGGTCTTCAAGGAGTCCCTAA
TRCN0000034183	TRIM50C	CTCATCGCCAAACTGGTGAAA
TRCN0000034014	TRIM51	CCTGCATTTCTCCATGAAGAA
TRCN0000034015	TRIM51	CCCTCAAGATGATCCCGATAT
TRCN0000034016	TRIM51	GCTTTGTTGATGTTGATCAAA
TRCN0000034017	TRIM51	CAGTGGATTCAGAGTTGATTT
TRCN0000034018	TRIM51	GCAAAGCCAGAATGGAACATT
TRCN0000034019	TRIM52	GCAAGCTAGAATCAAAGAATT
TRCN0000034020	TRIM52	GCCAACATGGTCCAGATAATT
TRCN0000034021	TRIM52	GCATACGATGAGGACGAAGAT
TRCN0000034022	TRIM52	CGAGAAGAAGAAATACTGGAA
TRCN0000034023	TRIM52	CAAGACCAAGATGACGATGAA
TRCN0000033889	TRIM54	GCCAGACTATCGAGGACAATA
TRCN0000033890	TRIM54	GCATGGAGCAATTCACCGTAA
TRCN0000033891	TRIM54	CCTCGCAGAACACTAAGATTA
TRCN0000033892	TRIM54	CACCATTTACAAACGCCAGAA
TRCN0000033893	TRIM54	GTTCTCCAAACCAGTGGTGAT
TRCN0000034009	TRIM55	GCTACTTCTCAGGAGTTAGTA
TRCN0000034010	TRIM55	GCTTTGTGAGAAGTTTGATTA
TRCN0000034011	TRIM55	CAGCACAACCTGTGTAGGAAA
TRCN0000034012	TRIM55	CCAGGTTCTGAGGATTCGAAT
TRCN0000034013	TRIM55	CTATGAGAACATGAACCACTT
TRCN0000073093	TRIM56	CGTCTTCTAGTGTGTGAGAAT
TRCN0000073094	TRIM56	GCAGCAGAATAGTGTGGTAAT
TRCN0000073095	TRIM56	TGTGGATAAGAAGGGCTACAT
TRCN0000073096	TRIM56	CCTGGACTGTGCCGATGACTT
TRCN0000073097	TRIM56	CGCACGGCTCTATCTCATCAA
TRCN0000033800	TRIM58	GCTGCTGAAAGGGAATGAGTA
TRCN0000033802	TRIM58	GCAGAAGTAAGGCTGTCACAA
TRCN0000034164	TRIM59	GCATTGAATCTTTACCTGTTA
TRCN0000034165	TRIM59	GCTCTCTGTGATGTTGGCAAT
TRCN0000034166	TRIM59	CCTCTCTATCTGTTTACCAAA
TRCN0000034167	TRIM59	GTGCCCTAATTGCAGAAGTAT
TRCN0000034079	TRIM6	CCACTACTCTTTGTCCATATT
TRCN0000034080	TRIM6	GTGAGGTTTGTGGGAGCTAAA
TRCN0000034081	TRIM6	GTCTCTAAAGAAGCTGAAGAA
TRCN0000034082	TRIM6	CCCATCTACACTTTCTCTAAA
TRCN0000034083	TRIM6	CAAGCCTGCATCACACCAAAT
TRCN0000034139	TRIM60	GCTCCGTAATTTGACTGAAAT
TRCN0000034140	TRIM60	GCGATACATGAAGAGTGGTTA
TRCN0000034141	TRIM60	CCCTTGAGGAATAATATAGAA
TRCN0000034142	TRIM60	GAGATGATTCTTAGGCAGATA
TRCN0000034143	TRIM60	GATTTAGTTCTGGCCGACATT
TRCN0000033869	TRIM62	GCGGATCAACACCGTCCTCAT
TRCN0000033870	TRIM62	CATGAGACCAACCTCACATAT
TRCN0000033871	TRIM62	CGGCTTCTACTGCATCGTGAT
TRCN0000033872	TRIM62	CTCATCTTCTACAATGCTGAT
TRCN0000033873	TRIM62	CATTGTGGCTTACGGCAACTT
TRCN0000073118	TRIM63	GTATAATAATGCCTGGTCATT
TRCN0000073119	TRIM63	CAGAAGTTTGACACGTTGTAT
TRCN0000073120	TRIM63	GAAGAGGAAGAGTCCACAGAA
TRCN0000073121	TRIM63	GAACATGGACTTCTTTACTTT
TRCN0000073122	TRIM63	GACATCTTCCAGGCTGCAAAT
TRCN0000033859	TRIM68	GCCTGGGAGTATGTAAGCAAA
TRCN0000033861	TRIM68	CAGAGTATTGTATGGGAGTTT
TRCN0000033862	TRIM68	GCTATAATATCGTCCTGGGAA
TRCN0000033863	TRIM68	CAGGATATTCAGGAAGTGTTA
TRCN0000033969	TRIM7	CAGAAAGATAATAGAGTCCAT
TRCN0000033970	TRIM7	CGTGGGACATTACAGAGGCCT
TRCN0000033971	TRIM7	GTGGGACATTACAGAGGCCTG
TRCN0000033972	TRIM7	ACTGTGAGGTGTTCCGGTCCA
TRCN0000033973	TRIM7	CTGGAGGACTGTGAGGTGTTC
TRCN0000033964	TRIM8	GCCGCAAGATTCTCGTCTGTT
TRCN0000033965	TRIM8	GCTGCCGTGCAAACACAACTT
TRCN0000033966	TRIM8	CCGAAGGAATGAAATCCGGAA
TRCN0000033967	TRIM8	GCAGCCGTCCACCAAACACTA
TRCN0000033968	TRIM8	CTCTTTGATAAGACGGAGGAT
TRCN0000034069	TRIM9	CCTGGACAAGATGAGCCTATA
TRCN0000034070	TRIM9	CGATGCCCTCAACAGAAGAAA
TRCN0000034071	TRIM9	CGATGAACAACAAGGTCCCAT
TRCN0000034072	TRIM9	CGACAAAGCTTGGGCAATGTA
TRCN0000022374	TRIP12	CCTGAGTCAAGGAAACATGTT
TRCN0000022375	TRIP12	CCGGAGTTTGAATCCACCTTT
TRCN0000022376	TRIP12	CCCTAAAGTTAGCCTTCCTAA
TRCN0000022377	TRIP12	CCGTATAACATGACTGTGTAT
TRCN0000022378	TRIP12	CGGATCATTGAGCAAATCAAT
TRCN0000007560	TSG101	CCCAGAATAAGTTATTGCAGT
TRCN0000007561	TSG101	CGTCCTATTTCGGCATCCTAT
TRCN0000007562	TSG101	CCTTATCTACATGAATGGAAA
TRCN0000007563	TSG101	GCCTTATAGAGGTAATACATA
TRCN0000007564	TSG101	GCAGAGCTCAATGCCTTGAAA
TRCN0000004486	UBASH3A	GAGAGCCCTATTCCAGTACAA
TRCN0000004487	UBASH3A	TCCATCACTCTTTAGCCATAT
TRCN0000004488	UBASH3A	CAATTTAACTAGAGCCTCCTT
TRCN0000004489	UBASH3A	CGAGTGGAACCTGGAATCTTT
TRCN0000007735	UBB	CCGTACTCTTTCTGACTACAA
TRCN0000007736	UBB	CCGCACTCTTTCTGACTACAA
TRCN0000007737	UBB	GCCAAGATCCAGGATAAAGAA
TRCN0000011107	UBC	CGAGAATGTCAAGGCAAAGAT
TRCN0000011108	UBC	GCAAAGATCCAAGACAAGGAA
TRCN0000011109	UBC	CGAGAACGTCAAAGCAAAGAT
TRCN0000011110	UBC	AGGTTGATCTTTGCTGGGAAA
TRCN0000011111	UBC	GAGGTTGATCTTTGCCGGAAA
TRCN0000007589	UBD	CGAACACATCTTCTGATGATT
TRCN0000007590	UBD	CGAGACTAAGACGGGTATAAT
TRCN0000007591	UBD	CCTTACCCTGAAAGTGGTGAA
TRCN0000007592	UBD	TGGGATTTAATGACCTTTGAT
TRCN0000007593	UBD	GCTGGGCTCCAAGATCTTAAA
TRCN0000004000	UBE1	CCACTGCCTTCTACCTTGTTT
TRCN0000004001	UBE1	CTCCAACTTCTCCGACTACAT
TRCN0000004002	UBE1	GCACAAATTAGAGATCACCAT
TRCN0000004003	UBE1	CCTGGGATGTCACGAAGTTAA
TRCN0000004004	UBE1	GTGCTATGGTTTCTATGGTTA
TRCN0000007253	UBE1C	GAGCAAATGTATTGCTTCTTT
TRCN0000007254	UBE1C	CGACACTTTCTATCGACAATT
TRCN0000007255	UBE1C	CCTCTATTGAAGAACGAACAA
TRCN0000007256	UBE1C	GCCTGGAATGACTGCTTGTAT
TRCN0000007257	UBE1C	CCACAGACTGTACTATTCAAA
TRCN0000007196	UBE1L	GCTACCTACATCTGGCTGAAA
TRCN0000007197	UBE1L	CCTAATAAAGTGCTTGAGGAT
TRCN0000007198	UBE1L	GCATGAGTTTGAAGAACTCTT
TRCN0000007199	UBE1L	AGCCGCTATGATGGGCAAATT
TRCN0000004005	UBE2A	CCAATCCCAATAGTCCAGCAA
TRCN0000004006	UBE2A	TCTTCCATTCTAACATCCATA
TRCN0000004007	UBE2A	CCATTCTAACATCCATACAGT
TRCN0000004008	UBE2A	CCAGGAGAACAAACGGGAATA
TRCN0000004009	UBE2B	GCTTTAATTGTGTGGTGCTTT
TRCN0000004010	UBE2B	GCAGTTATATTTGGACCAGAA
TRCN0000004011	UBE2B	GAATCCTAACAGTCCAGCCAA
TRCN0000004012	UBE2B	CGGGATTTCAAGCGGTTACAA
TRCN0000004013	UBE2B	CATGCGGGATTTCAAGCGGTT
TRCN0000004240	UBE2C	TGTCTGGCGATAAAGGGATTT
TRCN0000004241	UBE2C	CCCTTACAATGCGCCCACAGT
TRCN0000004242	UBE2C	TGGAACAGTATATGAAGACCT
TRCN0000004243	UBE2C	CCTGCAAGAAACCTACTCAAA
TRCN0000003381	UBE2D1	CTTCTTTCTCACTGTACATTT
TRCN0000003382	UBE2D1	GTTCTCTACTTTGTGATCCTA
TRCN0000003383	UBE2D1	GCCATTAGTCACCATTAGTTA
TRCN0000003384	UBE2D1	GCGATCCACCTGCTCACTGTT
TRCN0000003385	UBE2D1	ACAACAGACATGCAAGAGAAT
TRCN0000003386	UBE2D2	GTTCTCTGTTGTGTGATCCCA
TRCN0000003387	UBE2D2	CTCCAGCACTAACTATTTCAA
TRCN0000003388	UBE2D2	GCTGAGATTAGTGGTGGATTT
TRCN0000003389	UBE2D2	CCTGTTGGAGATGATATGTTC
TRCN0000003390	UBE2D2	TGTCCATCTGTTCTCTGTTGT
TRCN0000038789	UBE2D3	CCTGCATTATAGCTGGAATAA
TRCN0000038790	UBE2D3	GCCTGCTTTAACAATTTCTAA
TRCN0000038791	UBE2D3	GCCACAATTATGGGACCTAAT
TRCN0000038793	UBE2D3	CCCATATCAAGGCGGTGTATT
TRCN0000004120	UBE2D4	GCCGACAGAGAGAAGTACAAC
TRCN0000004121	UBE2D4	CTAGAGATTTGGGTCATGTTA
TRCN0000004122	UBE2D4	CAAGGCCGACAGAGAGAAGTA
TRCN0000004123	UBE2D4	ATCACCCTAATATCAACAGCA
TRCN0000004124	UBE2D4	CACCCTAATATCAACAGCAAT
TRCN0000004014	UBE2E1	GTTGGTAAAGAGTAGGGTATT
TRCN0000004015	UBE2E1	CCGTGTATGAGGGTGGTGTAT
TRCN0000004016	UBE2E1	CCTCCTTTCTATCTGCTCACT
TRCN0000004017	UBE2E1	GCAAACCGAGAAAGAAACAAA
TRCN0000004018	UBE2E1	GTCCAGCACTAACCATTTCTA
TRCN0000011177	UBE2E2	GCTTTCTTACAAAGCTTTGTA
TRCN0000011178	UBE2E2	CCGATGGAGATCAACGTGAAA
TRCN0000011180	UBE2E2	CGTGAAAGTGTTCAGCAAGAA
TRCN0000007575	UBE2E3	CGGACTTCTGTGTATATGTTA
TRCN0000007576	UBE2E3	GCTTTGACTATTTCAAAGGTT
TRCN0000007577	UBE2E3	CCACTGCTAAGTTATCCACTA
TRCN0000007578	UBE2E3	CCACCGGGTTCTGTATATGAA
TRCN0000007579	UBE2E3	AGAGCAGAACACGACAGGATA
TRCN0000007200	UBE2G1	GCCTGGTATTAAGGTTGGATA
TRCN0000007201	UBE2G1	GCTAATGTTGATGCTGCGAAA
TRCN0000007202	UBE2G1	CGATGGGAAGTCCTTATTATT
TRCN0000007203	UBE2G1	GCAGGTTTAATAGATGACAAT
TRCN0000007204	UBE2G1	CCTCCAGATACACTTTATGAA
TRCN0000004019	UBE2G2	GTTTCCCACTTGATTACCCGT
TRCN0000004020	UBE2G2	CGACCATACTCATCAAAGATT
TRCN0000004021	UBE2G2	CAATGACGAAAGTGGAGCTAA
TRCN0000004022	UBE2G2	GATGAGATTTACCTGTGAGAT
TRCN0000004023	UBE2G2	GAGATTTACCTGTGAGATGTT
TRCN0000004024	UBE2H	ACCTACCTGATAAATACCCTT
TRCN0000004025	UBE2H	CTTCATGTTCTGGTTTGGTTT
TRCN0000004026	UBE2H	CGGAGTATGGAAAGTTAGAGT
TRCN0000004027	UBE2H	GAGTGGACCTACCTGATAAAT
TRCN0000004028	UBE2H	CCACAAGGAACACCATATGAA
TRCN0000007205	UBE2I	GCCTACACGATTTACTGCCAA
TRCN0000007206	UBE2I	TGGAGGAAAGACCACCCATTT
TRCN0000007207	UBE2I	ACCACCATTATTTCACCCGAA
TRCN0000004130	UBE2J1	CCACCAAGCATTATTCTCCTA
TRCN0000004131	UBE2J1	GCTGAGATTGTGTGCTAGGAA
TRCN0000004132	UBE2J1	CGTGGAGTATAAGGACAGCAT
TRCN0000004133	UBE2J1	CCAAGAGACAACCACACTGAT
TRCN0000004134	UBE2J1	CAGCTCTTATATTCCGACGAA
TRCN0000034084	UBE2J2	CGCGCTCATCTTTCTTCGTTT
TRCN0000034085	UBE2J2	GAAGTCGTGGAGGAGATTAAA
TRCN0000034086	UBE2J2	CAAACCTCCCAGTATCTATAT
TRCN0000034087	UBE2J2	GAAGGTGGCTATTATCATGGA
TRCN0000034088	UBE2J2	CGCATTAAGAAAGACCCGGTG
TRCN0000007208	UBE2L3	CCTTAGAATTTATCGTCAGAT
TRCN0000007209	UBE2L3	CCAGCAGAGTACCCATTCAAA
TRCN0000007210	UBE2L3	GCTAATTTATTGACTTGGCAA
TRCN0000007211	UBE2L3	CCACCGAAGATCACATTTAAA
TRCN0000007212	UBE2L3	GAATACTCTAAGGACCGTAAA
TRCN0000007281	UBE2L6	GAATCAAACTTCCATCCTGAA
TRCN0000007282	UBE2L6	GCTGGTGAATAGACCGAATAT
TRCN0000007283	UBE2L6	GATCAAATTCACAACCAAGAT
TRCN0000007284	UBE2L6	CTGTTCAGAAAGAATGCCGAA
TRCN0000007258	UBE2M	CGATGGGAAATGAATTGGCTT
TRCN0000007259	UBE2M	GCGGATCCAGAAGGACATAAA
TRCN0000007260	UBE2M	CAAGGTGAAGTGTGAGACAAT
TRCN0000007261	UBE2M	CTTCTACAAGAGTGGGAAGTT
TRCN0000007262	UBE2M	CCTGCCCAAGACGTGTGATAT
TRCN0000007213	UBE2N	GCTGAGGCATTTGTGAGTCTT
TRCN0000007214	UBE2N	GCCTTGTTAAGTGCTCCCAAT
TRCN0000007215	UBE2N	CCATAGAAACAGCTAGAGCAT
TRCN0000007216	UBE2N	CCTTCCAGAAGAATACCCAAT
TRCN0000007217	UBE2N	CTAGGCTATATGCCATGAATA
TRCN0000004201	UBE2Q	CACTATGAAATGAAAGAGGAA
TRCN0000004202	UBE2Q	CCGACTTCATTCTACTTAACT
TRCN0000004203	UBE2Q	CCGACCTGTGTAAACTCTATA
TRCN0000004204	UBE2Q	GTTGAGATAAAGACGGGACAT
TRCN0000004205	UBE2Q	GCCAACAAATCTCAATACAGT
TRCN0000004225	UBE2R2	CTGGCGGAATACTGCATCAAA
TRCN0000004226	UBE2R2	GCCGACTGTTATGATGATGAT
TRCN0000004227	UBE2R2	CCAATGTCGATGCTTCAGTTA
TRCN0000004228	UBE2R2	GCCTGATGAAATGTGCTCCTT
TRCN0000004229	UBE2R2	CGACGACTTGTATGATGACGA
TRCN0000007672	UBE2S	GGGCTCTCTTCCTCCTTCCAC
TRCN0000007673	UBE2S	CCCGATGGCATCAAGGTCTTT
TRCN0000007674	UBE2S	GCACATCATCCGCCTGGTGTA
TRCN0000007675	UBE2S	TGGGCTCTCTTCCTCCTTCCA
TRCN0000007676	UBE2S	CCCATATGCTGGAGGTCTGTT
TRCN0000004386	UBE2T	GAACCTCCTCAGATCCGATTT
TRCN0000004387	UBE2T	GTACACAACTCAACACAGAAA
TRCN0000004388	UBE2T	GCCAACACACCTTATGAGAAA
TRCN0000004389	UBE2T	GTCCTGGTTCATCTTAGTTAA
TRCN0000004390	UBE2T	GCAAGATAAAGACCAAATGGA
TRCN0000011172	UBE2U	GAAATTCTTAACCACTCTGAA
TRCN0000011173	UBE2U	CCTACAGGTTATGCTTTCTAA
TRCN0000011174	UBE2U	GCATCAGAAAGAATGGAATTT
TRCN0000011175	UBE2U	CCTCCAGTTGTGAAATTTATA
TRCN0000011176	UBE2U	GCCAGAATACTGGTTAAAGAT
TRCN0000033704	UBE2V1	CCCTGGTTTCTTTAAGTCTTA
TRCN0000033705	UBE2V1	GCAAACTGAGTGATGAAGGAA
TRCN0000033706	UBE2V1	CCAAGAGCCATATCAGTGCTA
TRCN0000033707	UBE2V1	AGGACAGTGTTACAGCAATTA
TRCN0000033708	UBE2V1	CGCCTAATGATGTCTAAAGAA
TRCN0000004034	UBE2V2	CAAGGTGGACAGGCATGATTA
TRCN0000004035	UBE2V2	CAGAAGGACAAACATACAACA
TRCN0000004036	UBE2V2	GTCTTAAATCAACAACCTTCT
TRCN0000004037	UBE2V2	GCTCCTCCGTCAGTTAGATTT
TRCN0000003368	UBE3A	CCTACATCTCATACTTGCTTT
TRCN0000003369	UBE3A	CGGAATACTCAAGCAAAGAAA
TRCN0000003370	UBE3A	CCACCATTTGTAGACCACGTA
TRCN0000003371	UBE3A	GAGACATTTCAGCAACTTATT
TRCN0000003372	UBE3A	CCTGATGATGTGTCTGTGGAT
TRCN0000004775	UBE3B	GCTCGGTTCCTTTGAAGATTT
TRCN0000004776	UBE3B	CCGTGATGTATGTGAAAGTTT
TRCN0000004777	UBE3B	CCCAGTGAAGAGTCTCCTAAA
TRCN0000004778	UBE3B	CGTGCCATTTGCATCCTTCTT
TRCN0000004779	UBE3B	GCTGGTCACTATCTCCTCTTT
TRCN0000003399	UBE3C	GCCAGACATTACTACTTCCTA
TRCN0000003400	UBE3C	GTCCTATTTCTATCTCCACTT
TRCN0000003401	UBE3C	CCAGTCATTTATTCGAGGCTA
TRCN0000003402	UBE3C	GCAGATAAGCAAGAAGTTCAA
TRCN0000007395	UBE4A	CCCTGCTATTTCTCTTCCAAT
TRCN0000007396	UBE4A	CCGGCCAAACACAGAACTAAA
TRCN0000007397	UBE4A	GCTGGGAGTAATTCTGAGTAT
TRCN0000007398	UBE4A	GCTCGCTTATTACTTCAAGAT
TRCN0000007399	UBE4A	GCGCATCATCTCCATGTTGAA
TRCN0000007545	UBE4B	CCCTACTTAACATACTTGAAT
TRCN0000007546	UBE4B	CCGATATAACACTGCCTTTAA
TRCN0000007547	UBE4B	CGCCCTCTAATAGCCTTGAAA
TRCN0000007548	UBE4B	GCAGGGATCAAATCCACAATA
TRCN0000007549	UBE4B	CGCTATCATATTAGCACCATT
TRCN0000011112	UBL5	CGCGTTAAATGCAACACGGAT
TRCN0000011113	UBL5	CCGTTGGAACAAGATTGTCCT
TRCN0000011114	UBL5	CTATGAAATCCACGATGGGAT
TRCN0000011115	UBL5	GATTGTCCTGAAGAAGTGGTA
TRCN0000011116	UBL5	TGGGATGAACCTGGAGCTTTA
TRCN0000004437	UBOX5	GAGAAGTGTAACCGCAGTGAA
TRCN0000004438	UBOX5	CCGGCACATTCCTTTCCTTTA
TRCN0000004439	UBOX5	CGGCGGTATCCCTTGTATCAA
TRCN0000004440	UBOX5	TCATGGTTTCAGGACAGAGTA
TRCN0000004441	UBOX5	CATTGGCAGTGATCCCTTCTT
TRCN0000020560	UBP1	GCCAGTTAAATGCGGTTGAAT
TRCN0000020562	UBP1	CCACCAAATTAATCAGGTTTA
TRCN0000020563	UBP1	CGGCTACAATACACAGAGCAT
TRCN0000004371	UBQLN1	CCTCAGCTACAGAATCCAGAA
TRCN0000004372	UBQLN1	GTTACAGATTCAGCAGGGTTT
TRCN0000004373	UBQLN1	GCTTCTCCCATAGGTAGTTTA
TRCN0000004374	UBQLN1	AGGTCTGAGTAGCTTGGGTTT
TRCN0000004375	UBQLN1	CTCCCAACTTTCCTCCAACAA
TRCN0000004376	UBQLN2	AGCAGTTTAAGGAAGCGATTT
TRCN0000004377	UBQLN2	ATGCAAGAGATGATGAGAAAT
TRCN0000004378	UBQLN2	ACCTGGCCTGATTCCGAGCTT
TRCN0000004379	UBQLN2	ACGCTTCAAATCCCAAACCGA
TRCN0000004380	UBQLN2	GTAACTCCACACCTATTTCCA
TRCN0000004196	UBQLN3	CTCTATGACTATCTCCAGCAA
TRCN0000004197	UBQLN3	CCACAGTTACAGGATGAGATA
TRCN0000004198	UBQLN3	AGTCAGTAGCAATCAAGGGAA
TRCN0000004199	UBQLN3	AGCCTTATTCATTCAAACCAT
TRCN0000004200	UBQLN3	TGTTCTAATCTTTGCTGGCAA
TRCN0000007738	UBQLN4	CCAGAGGAAATTCGTGTGAAA
TRCN0000007739	UBQLN4	GCGTCCATACTCTCTGGCTTT
TRCN0000007740	UBQLN4	CCCAAGGACAAGGAGGAAATT
TRCN0000007741	UBQLN4	GCTGCTCAGATGATGGTGAAT
TRCN0000003423	UBR1	GCGTTGAGTCTTCGATTAAAT
TRCN0000003424	UBR1	GCTTTCACTATCCAGGCAATT
TRCN0000003425	UBR1	GCTGGTCTTCATGTACGTTTA
TRCN0000003426	UBR1	CCAAGAGACTAATCAGATGTT
TRCN0000003427	UBR1	GCAGAGAAGAAATGTATGATA
TRCN0000003403	UBR2	CCTCCTTACCTTGATGACTAT
TRCN0000003404	UBR2	GCCGGAATGTGGAGAAGAAAT
TRCN0000003405	UBR2	CCTTTGTGAATGCTTGAGTAA
TRCN0000003406	UBR2	GCATGGCACTACAAGAAGAAA
TRCN0000003407	UBR2	GCGTACACCATCCAAAGCATA
TRCN0000007273	UCHL1	GTGTGAGCTTCAGATGGTGAA
TRCN0000007274	UCHL1	CGGGTAGATGACAAGGTGAAT
TRCN0000007275	UCHL1	CTGTGGCACAATCGGACTTAT
TRCN0000007276	UCHL1	CCAGCATGAGAACTTCAGGAA
TRCN0000007535	UCHL3	GTCAATAATGGAAACACCAAA
TRCN0000007536	UCHL3	GCACCAAGTATAGATGAGAAA
TRCN0000007537	UCHL3	CCTGGAGGAATCTGTGTCAAT
TRCN0000007538	UCHL3	CCCTGATGAACTAAGATTTAA
TRCN0000007539	UCHL3	GTCTTACTTCTCTTTCCTATT
TRCN0000004125	UCHL5	TCCCGACTTGACACGATATTT
TRCN0000004126	UCHL5	ACGCAAAGAAAGCTCAGGAAA
TRCN0000004127	UCHL5	CCTGTTAATGGGAGACTGTAT
TRCN0000004128	UCHL5	TCTTGTCTTTAATGCATGGAT
TRCN0000004129	UCHL5	AGCTCATTAAAGGATTCGGTT
TRCN0000007485	UFD1L	GCTGTTCAAACTGACCAATAA
TRCN0000007486	UFD1L	CTGGCAATAGACTGGATGGAA
TRCN0000007487	UFD1L	TGGGCTACAAAGAACCCGAAA
TRCN0000007488	UFD1L	CAGCCGACTTAACATTACCTA
TRCN0000007489	UFD1L	CCCAATCAAGCCTGGAGATAT
TRCN0000004352	UHRF1	CCGCACCAAGGAATGTACCAT
TRCN0000004353	UHRF1	GCCTTTGATTCGTTCCTTCTT
TRCN0000004354	UHRF1	CATGCAGTATCCAGAAGGCTA
TRCN0000004355	UHRF1	TGTGAAATACTGGCCCGAGAA
TRCN0000004356	UHRF1	GCGCTGGCTCTCAACTGCTTT
TRCN0000003479	UHRF2	CGTCTCTTCTTCCATTACAAT
TRCN0000003480	UHRF2	GAAGTTGTAAAGGCTGGTGAA
TRCN0000003481	UHRF2	ACTGGTATTGTCCTTCTTGTA
TRCN0000003482	UHRF2	CTGCTGATGAAGACGTTATTT
TRCN0000073303	UREB1	GCGTCTGTGTTGTGGAGGTTT
TRCN0000073304	UREB1	CCACACTTTCACAGATACTAT
TRCN0000073305	UREB1	GCTCCCACTATAACCTCACTT
TRCN0000073306	UREB1	CGACGAGAACTAGCACAGAAT
TRCN0000073307	UREB1	GCTACACAAGATGGAGTCAAA
TRCN0000004043	USP1	GACTGAATAATCTCGGCAATA
TRCN0000004044	USP1	CCAGAGACAAACTAGATCAAA
TRCN0000004045	USP1	CCAGTGACCAAACAGGCATTA
TRCN0000004046	USP1	GCTCGTATTTGTATTCTCCAT
TRCN0000007430	USP10	GCCTCTCTTTAGTGGCTCTTT
TRCN0000007431	USP10	CCTATGTGGAAACTAAGTATT
TRCN0000007432	USP10	CCCATGATAGACAGCTTTGTT
TRCN0000007433	USP10	GCTGTGGATAAACTACCTGAT
TRCN0000007434	USP10	CGACAAGCTCTTGGAGATAAA
TRCN0000007358	USP11	CCCTCCCTTCTAGTCTTTATT
TRCN0000007359	USP11	CCGTGATGATATCTTCGTCTA
TRCN0000007360	USP11	CCGATTCTATTGGCCTAGTAT
TRCN0000007815	USP12	GCACCAATAATGCTTTGAATT
TRCN0000007816	USP12	CCAGATGTCTTACTTGTGAAA
TRCN0000007817	USP12	CCAGACAGAATGTACGACCTT
TRCN0000007818	USP12	CCAGAACAGTTTCCGGTCAAT
TRCN0000007819	USP12	CCTTTAGAACTTCGTCTGTTT
TRCN0000007248	USP13	GCAGATAAAGAAGTTCACTTT
TRCN0000007249	USP13	GCCAGTATCTAAATATGCCAA
TRCN0000007250	USP13	CGCCTGATGAACCAATTGATA
TRCN0000007251	USP13	CGATTTAAATAGCGACGATTA
TRCN0000007252	USP13	CCGGTGAAATCTGAACTCATT
TRCN0000007425	USP14	CCCAAGATTCAGCAGTCAGAT
TRCN0000007426	USP14	GCAGCCAAATACAAGTGACAA
TRCN0000007427	USP14	CCTTGGTAACACTTGTTACAT
TRCN0000007428	USP14	CGCAGAGTTGAAATAATGGAA
TRCN0000007429	USP14	GCAGCCCTTAGAGATTTGTTT
TRCN0000007565	USP15	CCGTAATCAATGTGGGCCTAT
TRCN0000007566	USP15	CCTTGGAAGTTTACTTAGTTA
TRCN0000007567	USP15	CCCATTGATAACTCTGGACTT
TRCN0000007568	USP15	GCTCTTGAGAATGTGCCGATA
TRCN0000007569	USP15	GCTCACCAAGTGAAATGGAAA
TRCN0000007594	USP16	GCCAGAAGAAATCATGTTTAT
TRCN0000007595	USP16	GCGAATAAACTGCTTTGTGAA
TRCN0000007596	USP16	CGGTGATATTCCACAAGATTT
TRCN0000007597	USP16	GCCAAGAACCAACGAAGACAA
TRCN0000007598	USP16	GCCTACAACTAAAGTACTAAA
TRCN0000004192	USP18	ACTGCATATCTTCTGGTTTAC
TRCN0000004193	USP18	CCTCATGGCCTGGTTGGTTTA
TRCN0000004194	USP18	CAGCAACATGAAGAGAGAGCA
TRCN0000004195	USP18	GAAGACAGCAACATGAAGAGA
TRCN0000051713	USP19	GCGTGATTTGATTCTGTTGTA
TRCN0000051714	USP19	CCTTCCAAGTTGAAGGCCATT
TRCN0000051715	USP19	GCTGATGAACAGCTTTGCATA
TRCN0000051716	USP19	GCGTGACAAGATCAATGACTT
TRCN0000051717	USP19	CGGAGGTAATTAAGAATCGTT
TRCN0000007277	USP2	CCGCGCTTTGTTGGCTATAAT
TRCN0000007278	USP2	GCTCACAACATTTGTGAACTT
TRCN0000007279	USP2	CCCATTGCTAAGCGAGGTTAT
TRCN0000007280	USP2	CCATGCTGTTTACAACCTGTA
TRCN0000007609	USP20	GCGACCATCATCAGGATCAAA
TRCN0000007610	USP20	CCCATTGACAACAGCAGGATT
TRCN0000007611	USP20	CGACACCTTCATCAAGTTGAA
TRCN0000007612	USP20	GACATCTTTGACGGCTCCATT
TRCN0000007613	USP20	CGCCTGTGAGAAGGAGGTATT
TRCN0000004347	USP21	GCTCCACCGATACTTGCCAAT
TRCN0000004348	USP21	GCCTTTCTACTCTGATGACAA
TRCN0000004349	USP21	CCACTTTGAGACGTAGCACTT
TRCN0000004350	USP21	GACCCTCTGCAATATCACTTT
TRCN0000004351	USP21	CCTGCGAAGCTGTGAATCCTA
TRCN0000046923	USP22	CGGACTATACTGAGAGCCTAT
TRCN0000046924	USP22	GCTGTTTCACAAAGAAGCATA
TRCN0000046925	USP22	CGAAGGGTACTTGCTGTTCTA
TRCN0000046926	USP22	CGGCGGAAGATCACCACGTAT
TRCN0000046927	USP22	GACAACAAGTATTCCCTGTTT
TRCN0000004366	USP25	GCACTTCTCCTGTTGACGATA
TRCN0000004367	USP25	GCTGTAGAAGATATGAGAAAT
TRCN0000004368	USP25	GCTGTTCCTCATCTGTGCTTA
TRCN0000004369	USP25	GCGTGAGCTGAGGTATCTATT
TRCN0000004370	USP25	TGGAGGAGTAAGATGAAATAT
TRCN0000011117	USP26	GCTATAATCGAGAGAAACAAT
TRCN0000011118	USP26	GAATCCAAGAAACAAAGACAT
TRCN0000011119	USP26	CTACTTTCAATCCCATCGTTT
TRCN0000011120	USP26	CAACTGAAAGATAACATGGAA
TRCN0000011121	USP26	GCAGATTGTTCGAGGTGTGTA
TRCN0000007742	USP28	GCACAGAAGTTCGTTGTCATA
TRCN0000007743	USP28	GCTCTAATGATGGGATCAAAT
TRCN0000007744	USP28	CCCAACTGAATCAGATCAAAT
TRCN0000004562	USP29	CTGGTGAAGAATAACGAGCAA
TRCN0000004563	USP29	CCCTCAATCAGTCTACAGAAT
TRCN0000004564	USP29	TGTGTGGAGTATCTTGGTGTA
TRCN0000004565	USP29	GCAGTGTATTGAGGAGAGCAT
TRCN0000004566	USP29	CCACTTTAGAGATAGGGCAAT
TRCN0000007604	USP3	GCTGCCTTTCCACAGCTATAA
TRCN0000007605	USP3	GCCTCATATGTGGGACAGAAT
TRCN0000007606	USP3	CCAACCATAAGAAATCAGAAA
TRCN0000007608	USP3	GCCCATGAATTCAATGCGCTA
TRCN0000038819	USP30	CTGTTGTGTTAAGAAAGCATT
TRCN0000038821	USP30	CCTGTTCGATTTGATACCTTT
TRCN0000038822	USP30	CCATGTCATTACCTCGTCATT
TRCN0000038823	USP30	CACACCAGTATTTATCCTTAA
TRCN0000004548	USP31	GACAGCATACATCCTCTTCTA
TRCN0000004549	USP31	GCTCCAATTCTCCATCCCGAT
TRCN0000004550	USP31	CTGTAGTGTATCAAGGCAAAT
TRCN0000004551	USP31	CTCTGCCTGATGTGCTTATTA
TRCN0000004552	USP31	GCTCTGTTAAGTCTGTCTGTA
TRCN0000011127	USP32	GCACTGATGATATTCCTGAAT
TRCN0000011128	USP32	CGTGAATACTACAGAAGAGAA
TRCN0000011129	USP32	GACGACAGTATGGGCTATCAA
TRCN0000011130	USP32	GTGGCTATACAACAGTGAGAA
TRCN0000011131	USP32	CCACCTATTCGTCCATCTCTA
TRCN0000004442	USP33	GTGGAATTTGTCAGCAGATAT
TRCN0000004443	USP33	CCTCCGGTTGTTCATGTTGAT
TRCN0000004444	USP33	CTGGATATAGAAGCGGATGAA
TRCN0000004445	USP33	GCAACAGTGATAGAGCAGAAA
TRCN0000004446	USP33	GCCTCAGAACATTTGGGATAA
TRCN0000038844	USP34	CCAGAGAATATCCGCCTTATT
TRCN0000038846	USP34	GCGAATTGAATTTGCCCATAA
TRCN0000038847	USP34	GCTCGTAACATGGCTGACTTA
TRCN0000038848	USP34	GCAGATATTGAAGCCCTCAAA
TRCN0000022444	USP36	GCGACTGAATATACACCTGTA
TRCN0000022445	USP36	CGTCCGTATATGTCCCAGAAT
TRCN0000022446	USP36	GCAACTCGAATAGCAGCAGAT
TRCN0000022447	USP36	GCGGTCAGTCAGGATGCTATT
TRCN0000022448	USP36	TCCAAGAAGAACATCGGCAAT
TRCN0000004567	USP37	GAGAATAAAGTCAGCCTAGTA
TRCN0000004568	USP37	CCGGATTTGCAGAAGATGATA
TRCN0000004569	USP37	CCCTAACTTCTCTGGCCTATT
TRCN0000004570	USP37	GCTACCGAGTTAAGTCTTCAA
TRCN0000038834	USP38	CGTCTAATACTATGACTGTTA
TRCN0000038836	USP38	CCAGAGATTCTTACTGGTGAT
TRCN0000038837	USP38	GCATCATTTGAACCTTCTGTA
TRCN0000038838	USP38	CCCTATCTATTAAGTTCCGTT
TRCN0000001150	USP39	GATTTGGAAGAGGCGAGATAA
TRCN0000001151	USP39	CCTTCCAGACAACTATGAGAT
TRCN0000001152	USP39	CTGAATAACATAAAGGCCAAT
TRCN0000001153	USP39	GTTGCCTCCATATCTAATCTT
TRCN0000001154	USP39	GCCGGGTATTGTGGGACTGAA
TRCN0000004038	USP4	CATGTCCGAGTTTGTCTGTAA
TRCN0000004039	USP4	GCACCACTGACTGACTACTTT
TRCN0000004040	USP4	CCCAACTGTAAGAAGCATCAA
TRCN0000004041	USP4	GCCCAGAATGTGCTAAGGTTT
TRCN0000004042	USP4	GAGGCGTGGAATAAACTACTA
TRCN0000038824	USP40	CCCGTGGAGAAGATTGAAATT
TRCN0000038825	USP40	CGGAGGCCATTACCATGTATA
TRCN0000038826	USP40	CGGAGATACTATTGGTGTTAA
TRCN0000038827	USP40	CCTCAGTATCATTTCTTCAAT
TRCN0000038828	USP40	CGGATTAATCTCAAGCCCTTT
TRCN0000038814	USP44	CGGATGATGAACTTGTGCAAT
TRCN0000038815	USP44	CGGCAGGAATTGGAGTATCAA
TRCN0000038816	USP44	CCTCGTCTAATGAAATCCTTA
TRCN0000038818	USP44	GCACAGGAGAAGGATACTAAT
TRCN0000022399	USP46	GACAGAAGAATTGGGTAGATA
TRCN0000022400	USP46	CCAGAGCAGTTTCCAATCAAT
TRCN0000022401	USP46	CGCTTACCAATGAAACTCGAT
TRCN0000022402	USP46	GCTAAACACTATTGCGGACAT
TRCN0000007692	USP47	CGGAATCATGTTGTGCACTAT
TRCN0000007693	USP47	GCGCAATACATGCAAGATAAA
TRCN0000007694	USP47	CCAGTGATTATGTCAGCCAAA
TRCN0000007695	USP47	GCAGCTTTCAAACAACATTTA
TRCN0000007696	USP47	CCGAGGAACTAGATATGAGTA
TRCN0000038829	USP48	GCATTAAAGCAAAGGTGGATT
TRCN0000038830	USP48	GCCACCATCTATGTCCATAAA
TRCN0000038831	USP48	GCGTAAGCAAAGTGTGGATAA
TRCN0000038832	USP48	CCACTTGTTATGTCAACACAT
TRCN0000038833	USP48	GCGTCTGAAGAACCAACTAAA
TRCN0000004476	USP49	CTAGAGGGAAATTACATACAT
TRCN0000004477	USP49	CGGGATCTCTACGTGTTCTGT
TRCN0000004478	USP49	CATGCTCTCCTCTCTTGACAA
TRCN0000004479	USP49	CTCAGTCAGGTCACATGTATA
TRCN0000004480	USP49	GCCGTAATCATCGAGAGAAGA
TRCN0000004066	USP5	CTTTGCCTTCATTAGTCACAT
TRCN0000004067	USP5	CGGCTGGCTATTGGTGTTGAA
TRCN0000004068	USP5	GATAGACATGAACCAGCGGAT
TRCN0000004069	USP5	GACCACACGATTTGCCTCATT
TRCN0000004070	USP5	AGCGAGGAGAAGTTTGAATTA
TRCN0000038859	USP50	CCGGAGAAGATCATATGAGAA
TRCN0000038860	USP50	CGTATGTTTAAAGTGTGAGAA
TRCN0000038861	USP50	CCAAGCGATTGCAGTGAAGTT
TRCN0000038862	USP50	GCAACCTCTACCCAGCATTTA
TRCN0000038849	USP51	GCCTGCAATCAGATGTCACAT
TRCN0000038850	USP51	CCCAGAGACTAGGAAACGTAA
TRCN0000038851	USP51	CCAACAGATTGTGTGCCCAAT
TRCN0000038852	USP51	CGTGCTACATAGACACAGCAA
TRCN0000004427	USP52	CCTCTCCCTTTACTGTTCTAT
TRCN0000004428	USP52	GCTTCCTTTCTCCATTCGCAT
TRCN0000004429	USP52	CCTGCCTTCTTGCGCTTCATT
TRCN0000004430	USP52	CAGTGATGATATTCGGCAGAT
TRCN0000038839	USP53	GCCACCAAAGAAATATGCTAT
TRCN0000038840	USP53	GCAGCCAAGATTCTAGGGATA
TRCN0000038841	USP53	CCTGGAAGTATGCTATCACTA
TRCN0000038842	USP53	CCTGTAATTCATAAGTCAGAT
TRCN0000038843	USP53	CCTGTCCAAATGAGACAGTTT
TRCN0000038854	USP54	GTTCTGTGATTCTCAGCTTAA
TRCN0000038855	USP54	CCAGCATATTGGGACCAGATT
TRCN0000038856	USP54	GCTGTAGTCCTTCAAATTCAT
TRCN0000038857	USP54	CCACAGGCAAGGTTTACCTAA
TRCN0000038858	USP54	CATGAGGGATAGTACAGGTTT
TRCN0000007335	USP6	CCCTGCAAGTTGATTCTCATT
TRCN0000007336	USP6	CGTTGGAATCAACAGCAGCAT
TRCN0000007337	USP6	GCGGAAGGACATACTTATGAA
TRCN0000004057	USP7	CCAGCTAAGTATCAAAGGAAA
TRCN0000004058	USP7	CCTGGATTTGTGGTTACGTTA
TRCN0000004059	USP7	TGTATCTATTGACTGCCCTTT
TRCN0000004060	USP7	GTGTCCTATATCCAGTGTAAA
TRCN0000007435	USP8	GCTGTGTTACTAGCACTATAT
TRCN0000007436	USP8	CCCAGATATAACCCAGGCTAT
TRCN0000007437	USP8	GCCAGAATGAAGAGGTGTCTA
TRCN0000007438	USP8	GCCTTCATGTATTTGTCTCTA
TRCN0000007439	USP8	CCACAGATTGATCGTACTAAA
TRCN0000007361	USP9X	GAGAGTTTATTCACTGTCTTA
TRCN0000007362	USP9X	CGATTCTTCAAAGCTGTGAAT
TRCN0000007363	USP9X	CGACCCTAAACGTAGACATTA
TRCN0000007364	USP9X	CGCCTGATTCTTCCAATGAAA
TRCN0000007365	USP9Y	GCAGTGTAACATTTCTAGATA
TRCN0000007366	USP9Y	CCTCCCAAGTTCTATACCTAA
TRCN0000007367	USP9Y	GCGATGTATTGTTAATCGTAT
TRCN0000007368	USP9Y	GCTCTTACATTACAGGACCTT
TRCN0000007369	USP9Y	GCTATCCAACTCAAACGATTT
TRCN0000004249	VCP	CCTATCAACAGCCATTCTCAA
TRCN0000004250	VCP	CCTAGCCCTTATTGCATTGTT
TRCN0000004251	VCP	CCTGATGTGAAGTACGGCAAA
TRCN0000004252	VCP	GATGGATGAATTGCAGTTGTT
TRCN0000004253	VCP	AGGGAGGTAGATATTGGAATT
TRCN0000010459	VHL	CAATGTTGACGGACAGCCTAT
TRCN0000010460	VHL	TATCACACTGCCAGTGTATAC
TRCN0000010461	VHL	TAGGATTGACATTCTACAGTT
TRCN0000039624	VHL	GCCTAGTCAAGCCTGAGAATT
TRCN0000039625	VHL	GATCTGGAAGACCACCCAAAT
TRCN0000039626	VHL	CCATCTCTCAATGTTGACGGA
TRCN0000073053	VPS11	GCTGTTTAAGAAGAACCTATT
TRCN0000073054	VPS11	CCTCAAGCATATCGAGAACAA
TRCN0000073055	VPS11	GCCAACTGTTGTATCTTGTTT
TRCN0000073056	VPS11	GCTTTGAGAGTTACTCGGAAA
TRCN0000073057	VPS11	GCTCCGACAAGCAGATTCTAA
TRCN0000072338	WSB2	CCAGACACTATTACTGGCTTT
TRCN0000072339	WSB2	CGGTAAACAGATTCAAGTGTT
TRCN0000072340	WSB2	CCCTTCGAAGTTTCCTAACAA
TRCN0000072341	WSB2	CACGGCTTCTTACGATACCAA
TRCN0000072342	WSB2	CCCACCAGTTTGATTGGAAGT
TRCN0000003395	WWP1	ATTGCTTATGAACGCGGCTTT
TRCN0000003396	WWP1	ACAACACACCTTCATCTCCGT
TRCN0000003397	WWP1	TCTGTAACTAAAGGTGGTCCA
TRCN0000003398	WWP1	CCTCTCAAATTCATAACAGTT
TRCN0000001512	WWP2	GTTTGTTAGGTTTGCCAGGTT
TRCN0000001513	WWP2	CGGCACAGAGTCATTTAGATT
TRCN0000001514	WWP2	CCTCACCTACTTTCGCTTTAT
TRCN0000001515	WWP2	CCCAAGGTGCATAATCGTCAA
TRCN0000001516	WWP2	CCAAAGATTCCTATACCAGTT
TRCN0000004530	ZA20D1	CGGGACTTGATGCTGCGGAAA
TRCN0000004531	ZA20D1	CGGTCCCATGTCTCCTCCAAT
TRCN0000004532	ZA20D1	CCCAACTCAGACCAAATGCAA
TRCN0000004533	ZA20D1	GCAAGGAGGCTAAACAAAGTT
TRCN0000004534	ZA20D1	CCTGTATATGAGAGCCTTGAA
TRCN0000012938	ZBTB16	CCACCGCAATAGTCAACACTA
TRCN0000012939	ZBTB16	GAATGCACTTACTGGCTCATT
TRCN0000012940	ZBTB16	GTGGACAGTTTGATGACCATA
TRCN0000012941	ZBTB16	CCGGGATGAGAGCACACTCAA
TRCN0000012942	ZBTB16	GCAATAGTCAACACTATACTT
TRCN0000037539	ZC3HC1	CGGAACAACCTTCATTGGAAT
TRCN0000037540	ZC3HC1	CCAGCAGATTGAATCGTCCAT
TRCN0000037541	ZC3HC1	CTCTCTGAGAAATCAAGGAAA
TRCN0000037542	ZC3HC1	CTGCTATTCTTGTTAGTGAAT
TRCN0000037543	ZC3HC1	CCTTGGGTGAATATCACACTT
TRCN0000073143	ZFYVE19	GTCCCTGGAATGAGGAAAGAT
TRCN0000073144	ZFYVE19	GCTATCGATGAAAGCTGGAAA
TRCN0000073145	ZFYVE19	CTGCCAGATTCCTCTGGTAAA
TRCN0000073146	ZFYVE19	GACACGACAAGACCAGATGAT
TRCN0000073147	ZFYVE19	ACACGACAAGACCAGATGATT
TRCN0000033724	ZNF179	CCAGAGATTGTCTGGCAGATA
TRCN0000033725	ZNF179	TCCACCCAGAAAGATGCCATT
TRCN0000033726	ZNF179	ACCTCTTAGTTCGTGACTCAT
TRCN0000033727	ZNF179	CCGGAAGATATGCAAGCAGAA
TRCN0000034099	ZNF650	GCAGTATATGACTGTGTTATT
TRCN0000034100	ZNF650	GCTTTGTGATAAGTGAACTAT
TRCN0000034101	ZNF650	CCGTTCATGATGTGAGGCTTT
TRCN0000034102	ZNF650	CGAGGCAAACCTCTCTACATT
TRCN0000034103	ZNF650	CCTTACGCAAAGACCACTTTA
TRCN0000073043	ZNRF1	CCCTAATATCTTGACTTCATT
TRCN0000073044	ZNRF1	ACAACGATGATGTGCTGACTA
TRCN0000073045	ZNRF1	CGAGATGGAAATGCACTTTAT
TRCN0000073046	ZNRF1	ACGAGATGGAAATGCACTTTA
TRCN0000073047	ZNRF1	CAGCTCGCATAGTGGTTTCAA
TRCN0000011162	ZNRF2	CCCTTAATAGTCATCTACATA
TRCN0000011163	ZNRF2	CCGCACATGTTTGGAGGATTT
TRCN0000011164	ZNRF2	GCCACGAATAACCTATAATGA
TRCN0000011165	ZNRF2	GAGGATGTACTGAGTAAAGAT
TRCN0000011166	ZNRF2	GCTCGGATCTACCTTCCAGTA
